# Supplementary material
Source: MDPI journal article supplement (https://www.mdpi.com/2073-4344/12/12/1645)
Supplement: s1 [file s1]

## SUPPLEMENTARY MATERIALS

### SPECTROSCOPIC DATA

#### 4-(2-(Cyclopropylmethoxy)ethyl)phenol (**2**)

<sup>1</sup>H NMR (600 MHz, CDCl<sub>3</sub>) of 4-(2-(cyclopropylmethoxy)ethyl)phenol

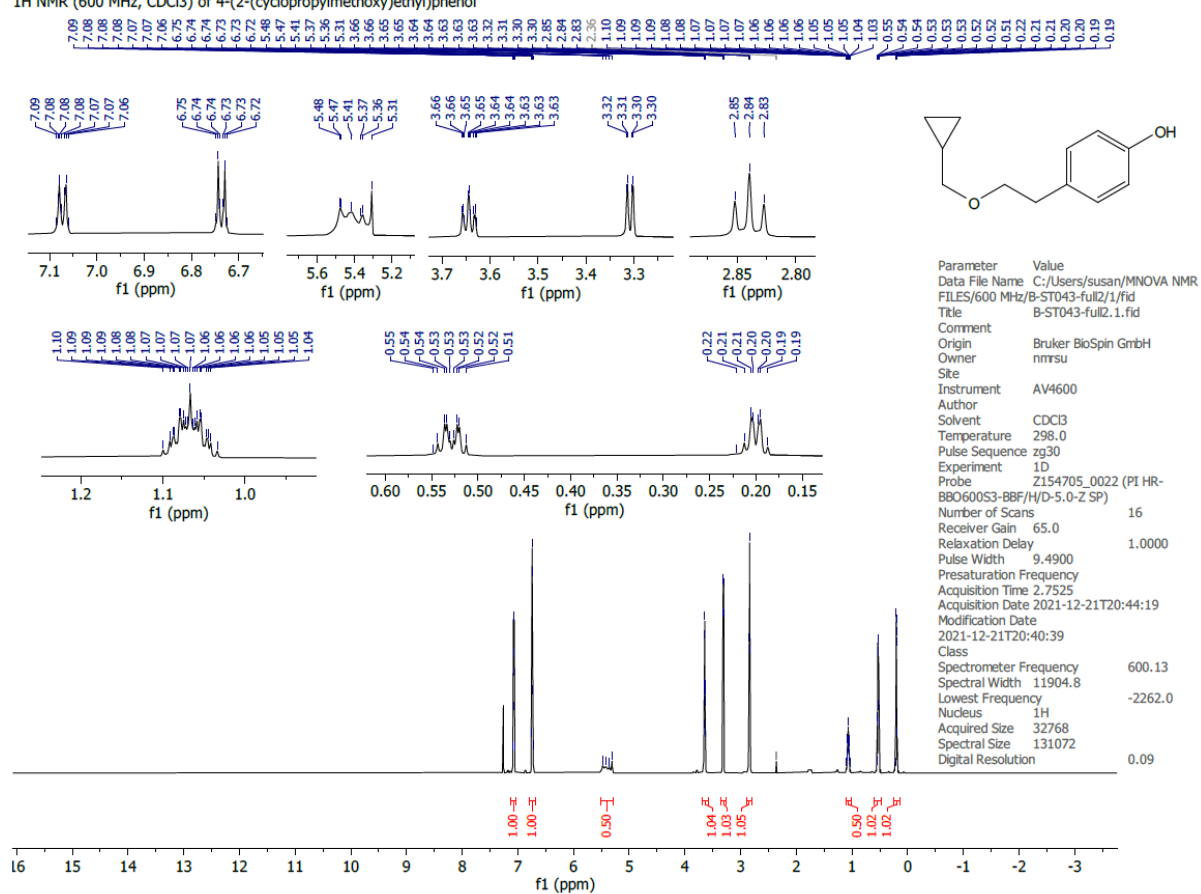

**Figure S1.** <sup>1</sup>H NMR spectrum (600 MHz, CDCl<sub>3</sub>) of 4-(2-(cyclopropylmethoxy)ethyl)phenol (**2**).

<sup>13</sup>C NMR (600 MHz, CDCl<sub>3</sub>) of 4-(2-(cyclopropylmethoxy)ethyl)phenol

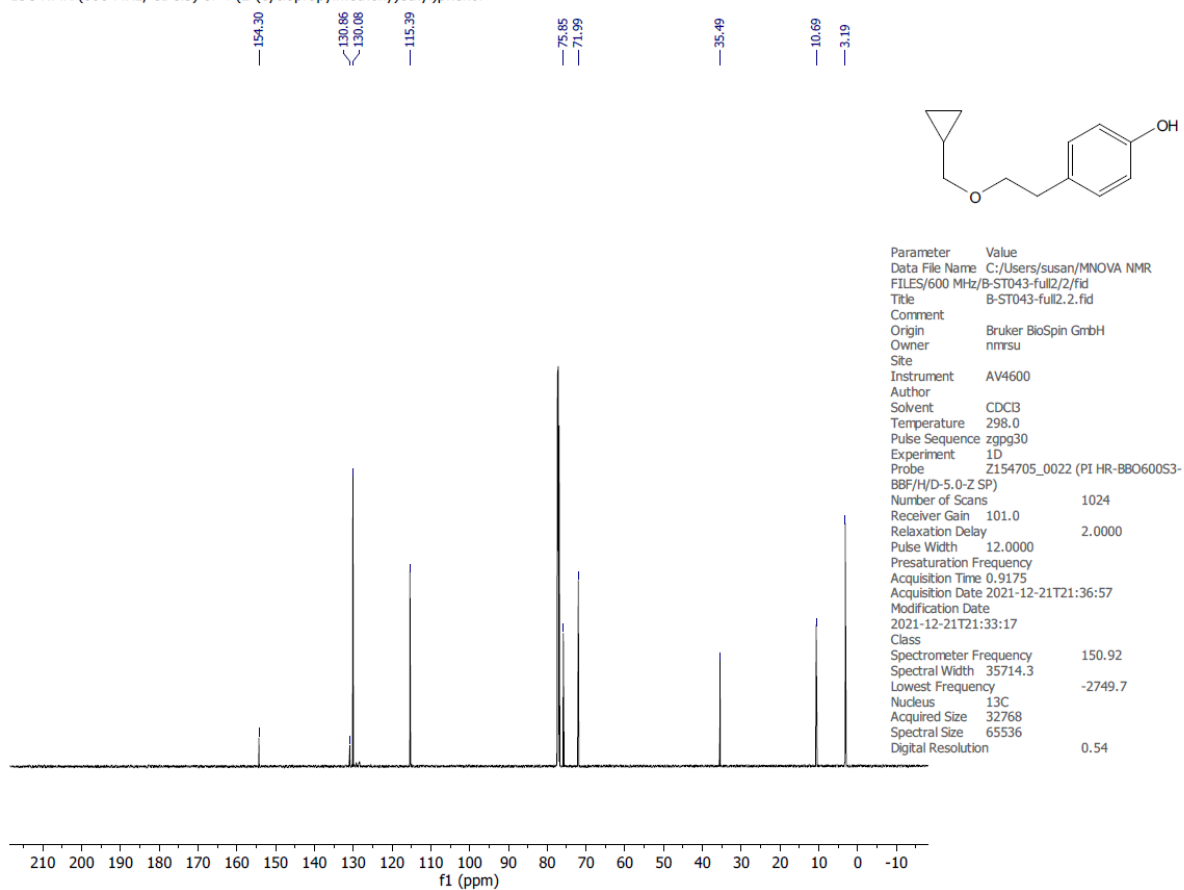

**Figure S2.** <sup>13</sup>C NMR spectrum (150 MHz, CDCl<sub>3</sub>) of 4-(2-(cyclopropylmethoxy)ethyl)phenol (2).

H-H COSY NMR (600 MHz, CDCl<sub>3</sub>) of 4-(2-(cyclopropylmethoxy)ethyl)phenol

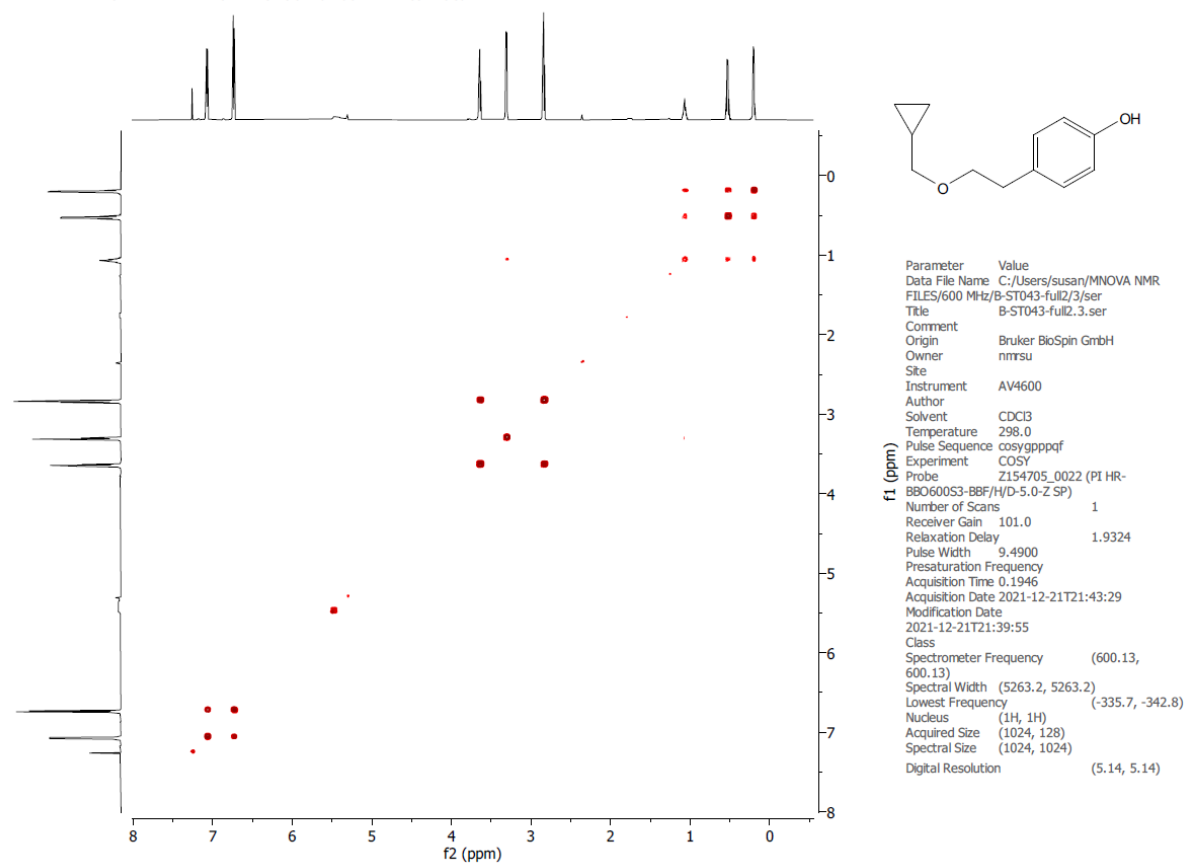

**Figure S3.** COSYNMR spectrum (600 MHz, CDCl<sub>3</sub>) of 4-(2-(cyclopropylmethoxy)ethyl)phenol (2).

C-H HMBC NMR (600 MHz, CDCl<sub>3</sub>) of 4-(2-(cyclopropylmethoxy)ethyl)phenol

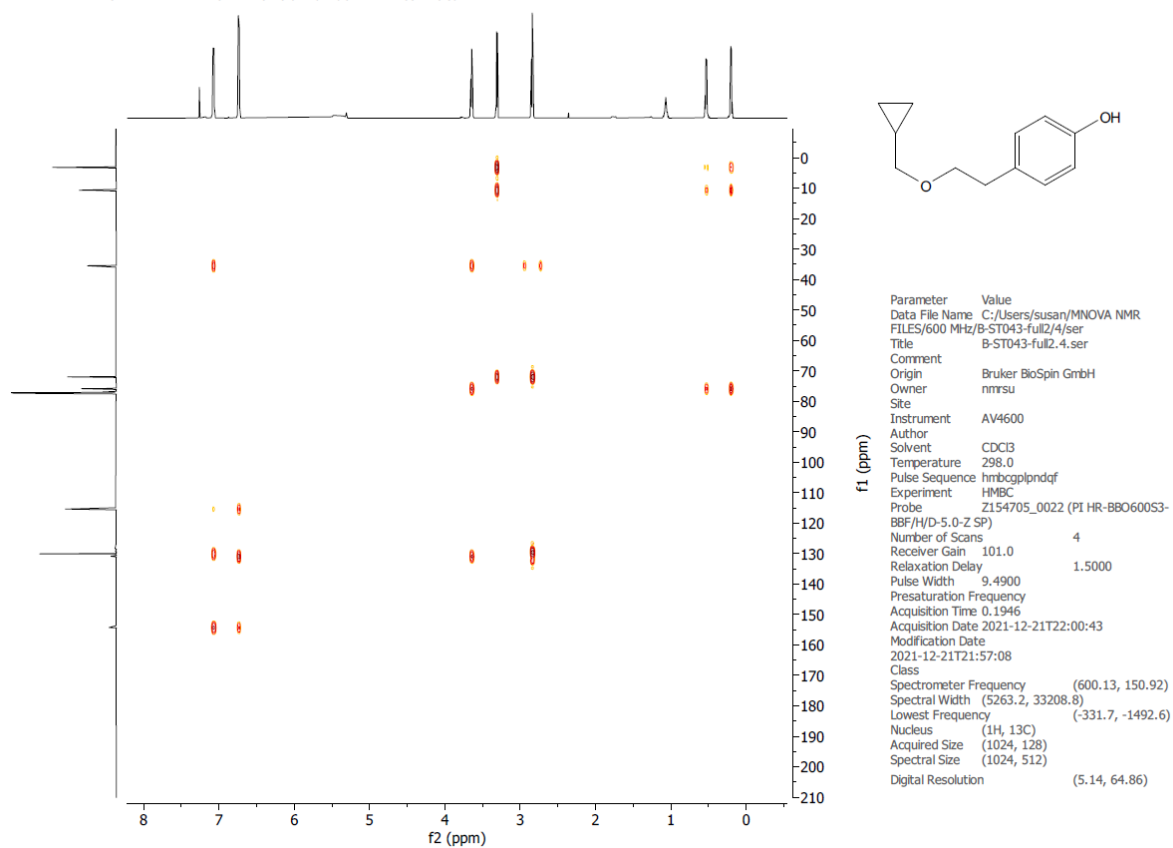

**Figure S4.** HMBC NMR spectrum (600 MHz, CDCl<sub>3</sub>) of 4-(2-(cyclopropylmethoxy)ethyl)phenol (**2**).

C-H HSQC NMR (600 MHz, CDCl<sub>3</sub>) of 4-(2-(cyclopropylmethoxy)ethyl)phenol

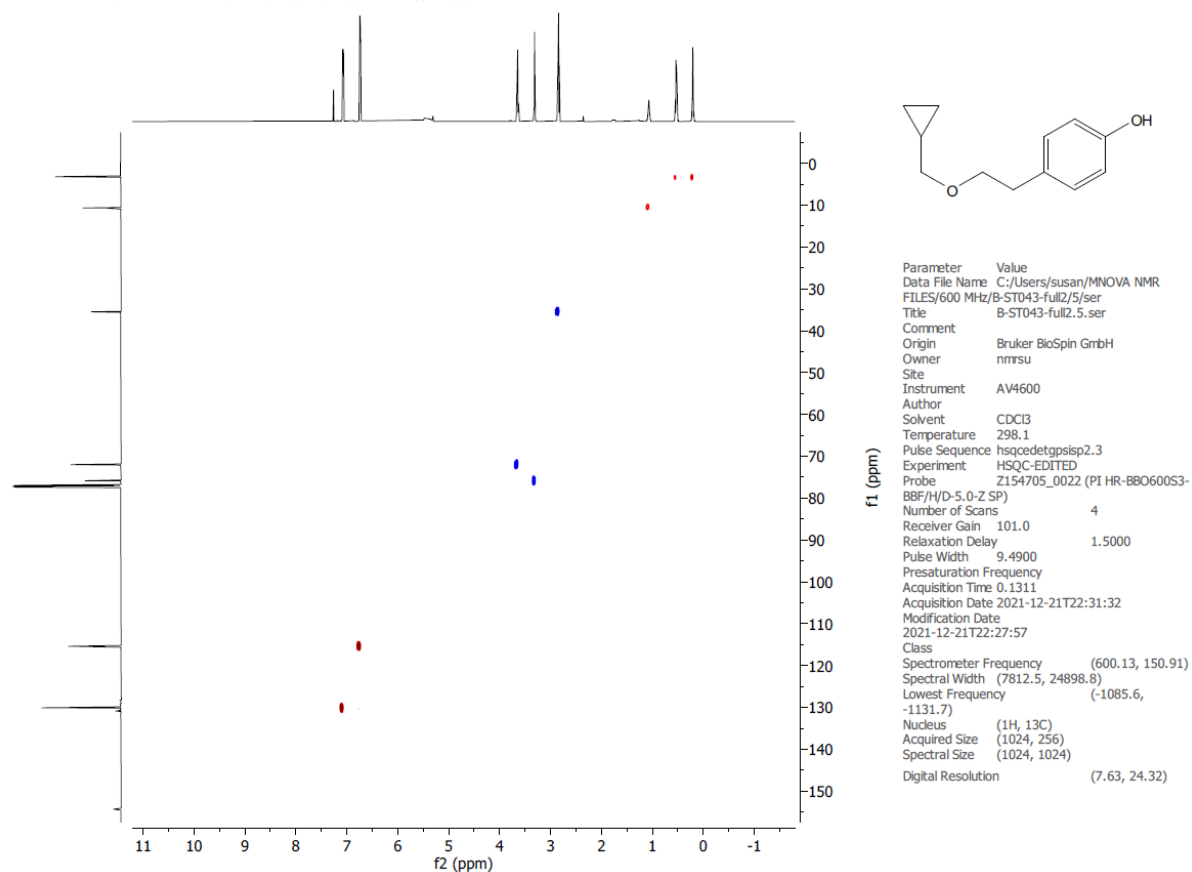

**Figure S5.** HSQC NMR spectrum (600 MHz, CDCl<sub>3</sub>) of 4-(2-(cyclopropylmethoxy)ethyl)phenol (**2**).

2-(4-(Cyclopropylmethoxy)phenyl)ethan-1-ol (**2b**)

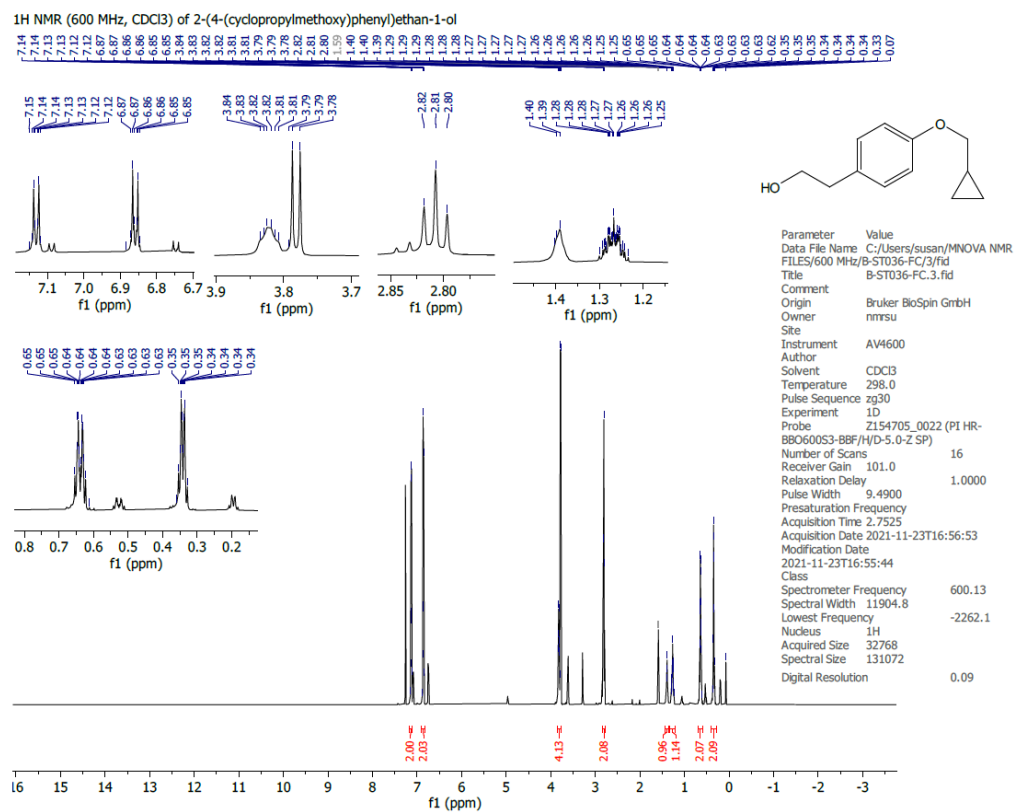

**Figure S6.** <sup>1</sup>H NMR spectrum (600 MHz, CDCl<sub>3</sub>) of 2-(4-(cyclopropylmethoxy)phenyl)ethan-1-ol (**2b**).

*1-(Cyclopropylmethoxy)- 4-(2-(cyclopropylmethoxy)ethyl)benzene (2c)*

<sup>1</sup>H NMR (600 MHz, CDCl<sub>3</sub>) of 1-(cyclopropylmethoxy)-4-(2-(cyclopropylmethoxy)ethyl)benzene

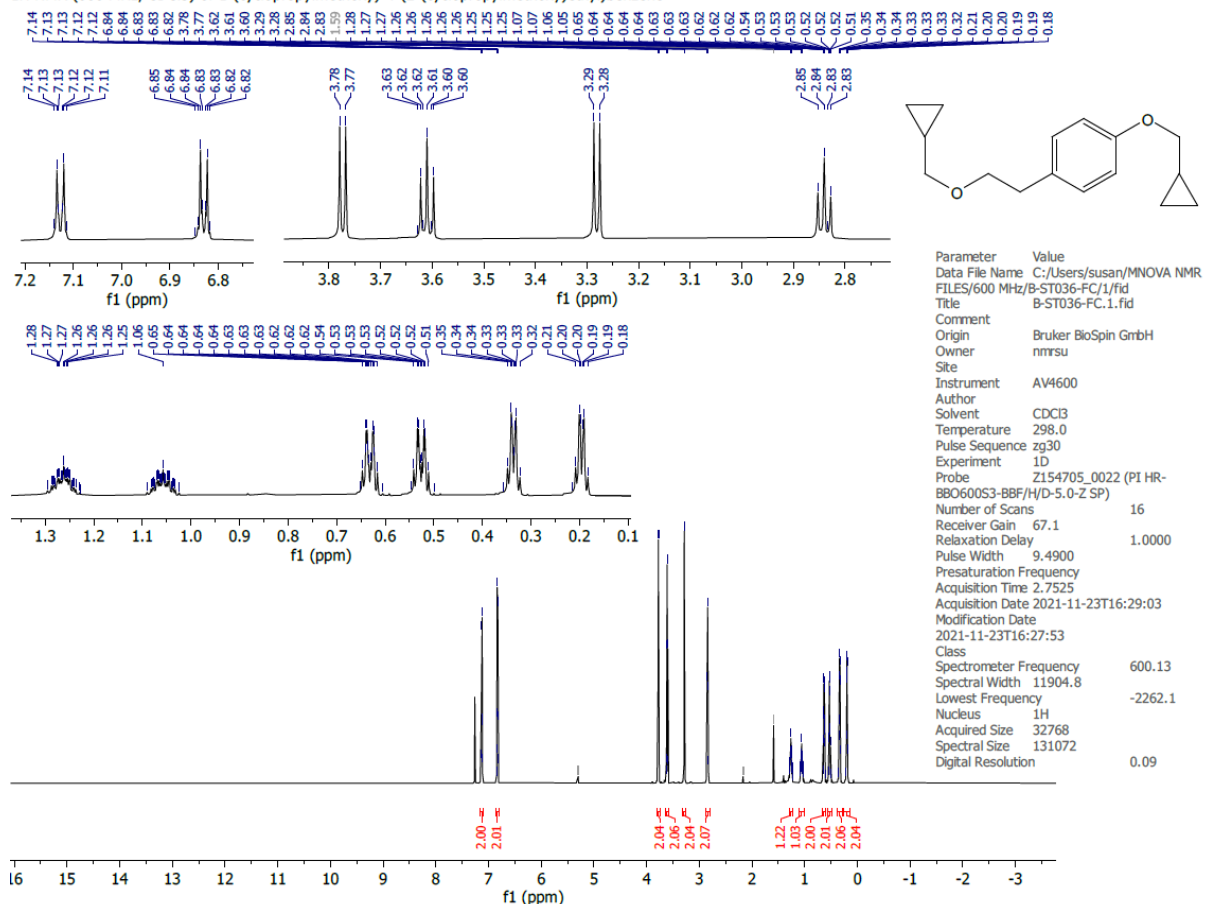

**Figure S7.** <sup>1</sup>H NMR spectrum (600 MHz, CDCl<sub>3</sub>) of 1-(cyclopropylmethoxy)- 4-(2-(cyclopropylmethoxy)ethyl)benzene (2c).

2-((4-(2-(Cyclopropylmethoxy)ethyl)phenoxy)-methyl)oxirane (**3**)

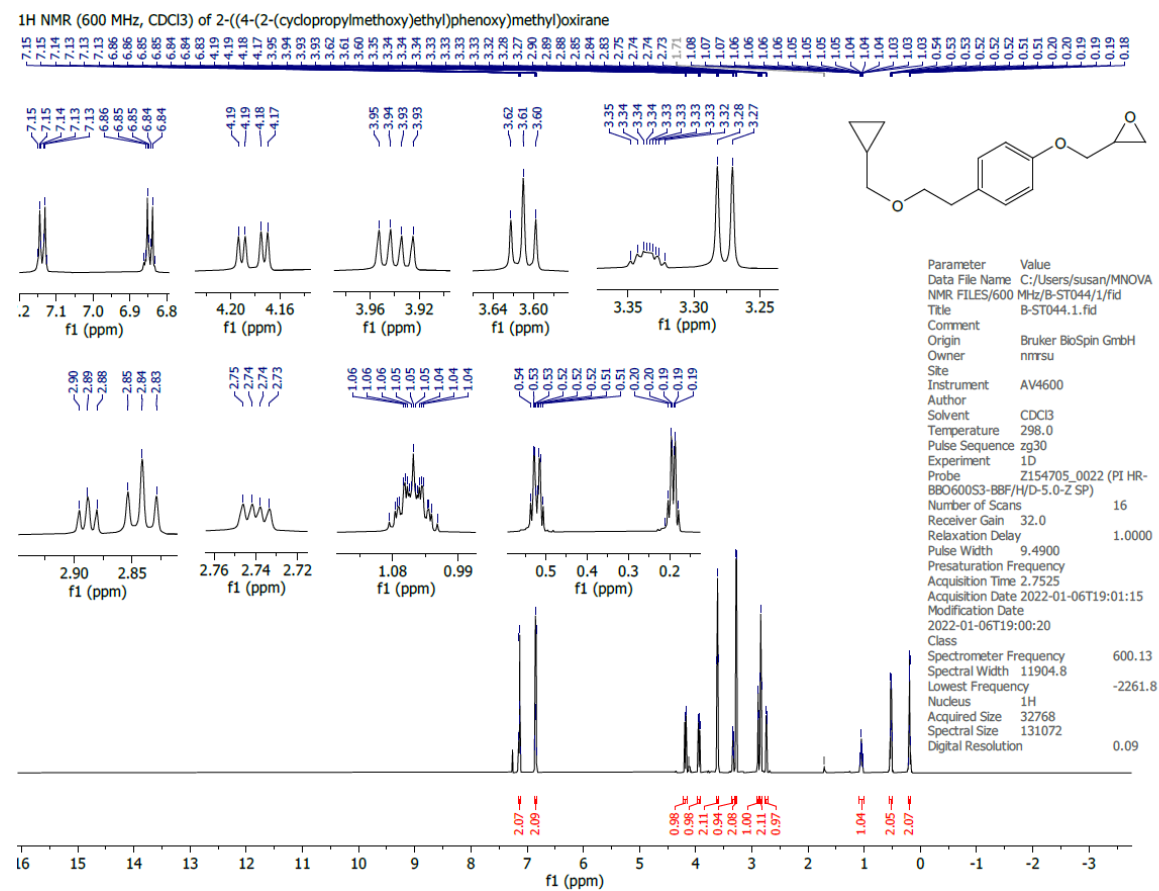

**Figure S8.** <sup>1</sup>H NMR spectrum (600 MHz, CDCl<sub>3</sub>) of 2-((4-(2-(cyclopropylmethoxy)ethyl)phenoxy)-methyl)oxirane (**3**).

<sup>13</sup>C NMR (600 MHz, CDCl<sub>3</sub>) of 2-((4-(2-(cyclopropylmethoxy)ethyl)phenoxy)methyl)oxirane

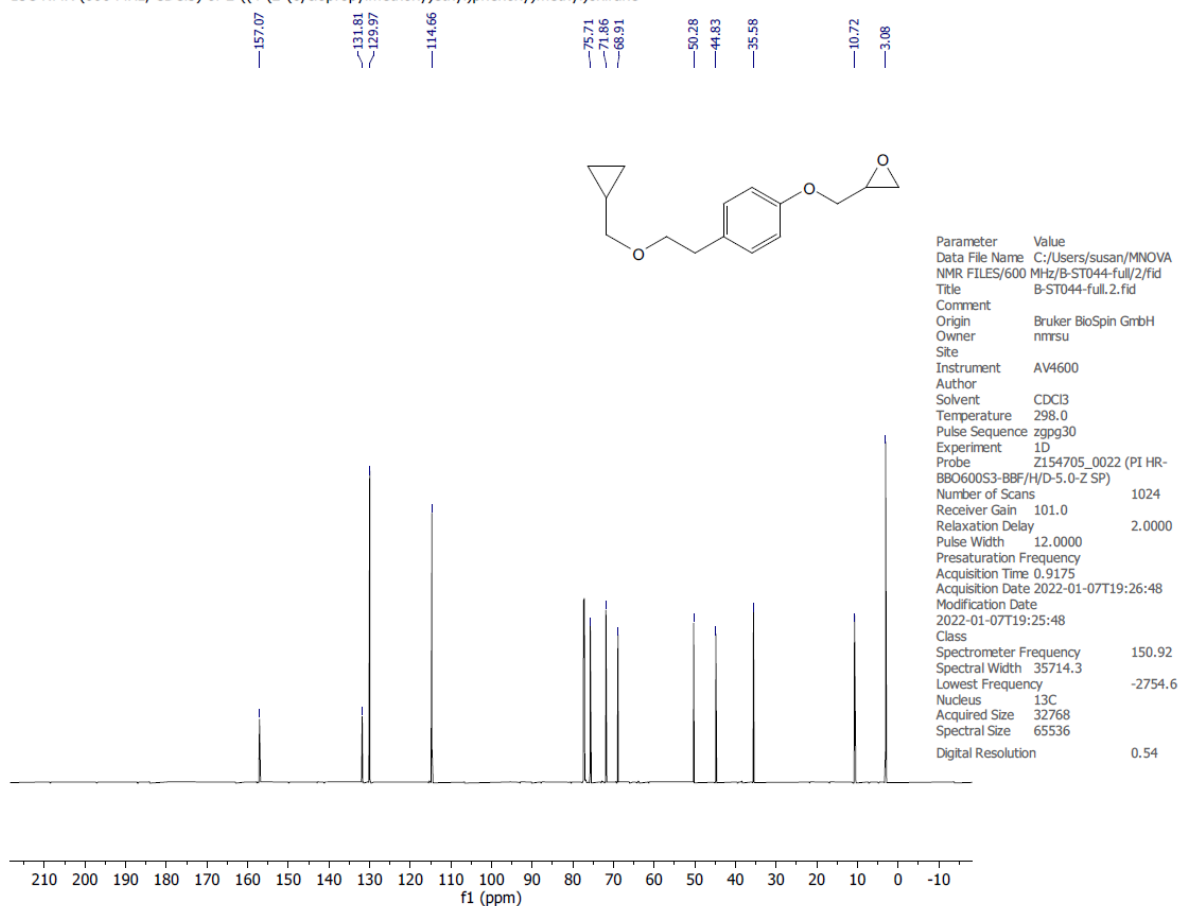

**Figure S9.** <sup>13</sup>C NMR spectrum (150 MHz, CDCl<sub>3</sub>) of 2-((4-(2-(cyclopropylmethoxy)ethyl)phenoxy)-methyl)oxirane (**3**).

H-H COSY NMR (600 MHz, CDCl<sub>3</sub>) of 2-((4-(2-(cyclopropylmethoxy)ethyl)phenoxy)methyl)oxirane

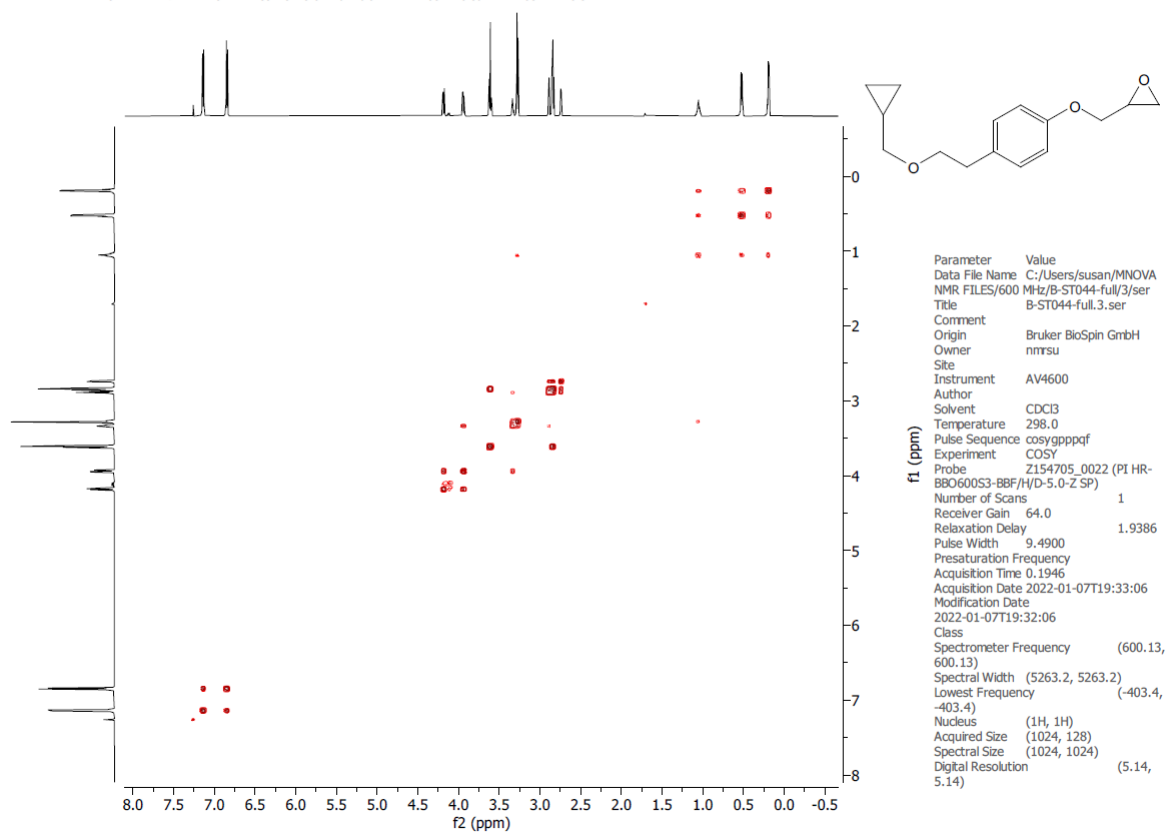

**Figure S10.** COSY NMR spectrum (600 MHz, CDCl<sub>3</sub>) of 2-((4-(2-(cyclopropylmethoxy)ethyl)phenoxy)-methyl)oxirane (**3**).

C-H HMBC NMR (600 MHz, CDCl<sub>3</sub>) of 2-((4-(2-(cyclopropylmethoxy)ethyl)phenoxy)methyl)oxirane

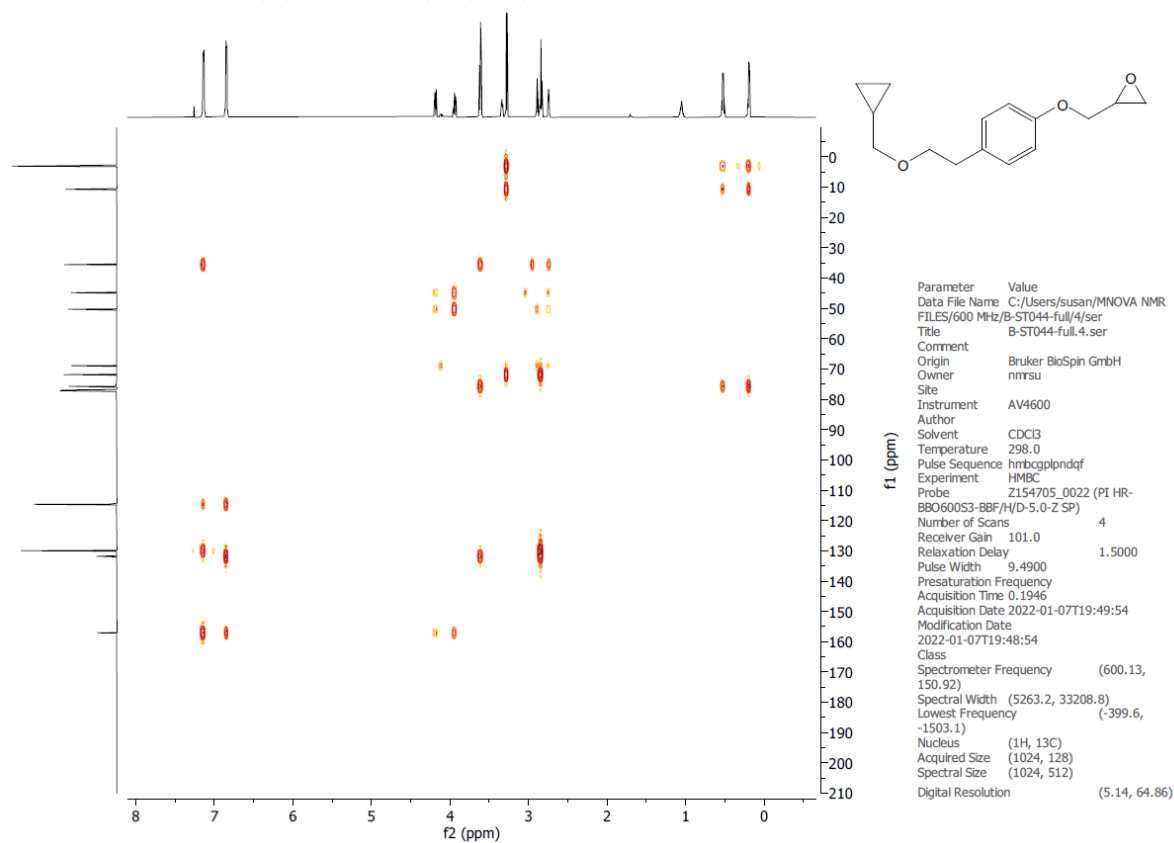

**Figure S11.** HMBC NMR spectrum (600 MHz, CDCl<sub>3</sub>) of 2-((4-(2-(cyclopropylmethoxy)ethyl)phenoxy)-methyl)oxirane (**3**).

C-H HSQC NMR (600 MHz, CDCl<sub>3</sub>) of 2-((4-(2-(cyclopropylmethoxy)ethyl)phenoxy)methyl)oxirane

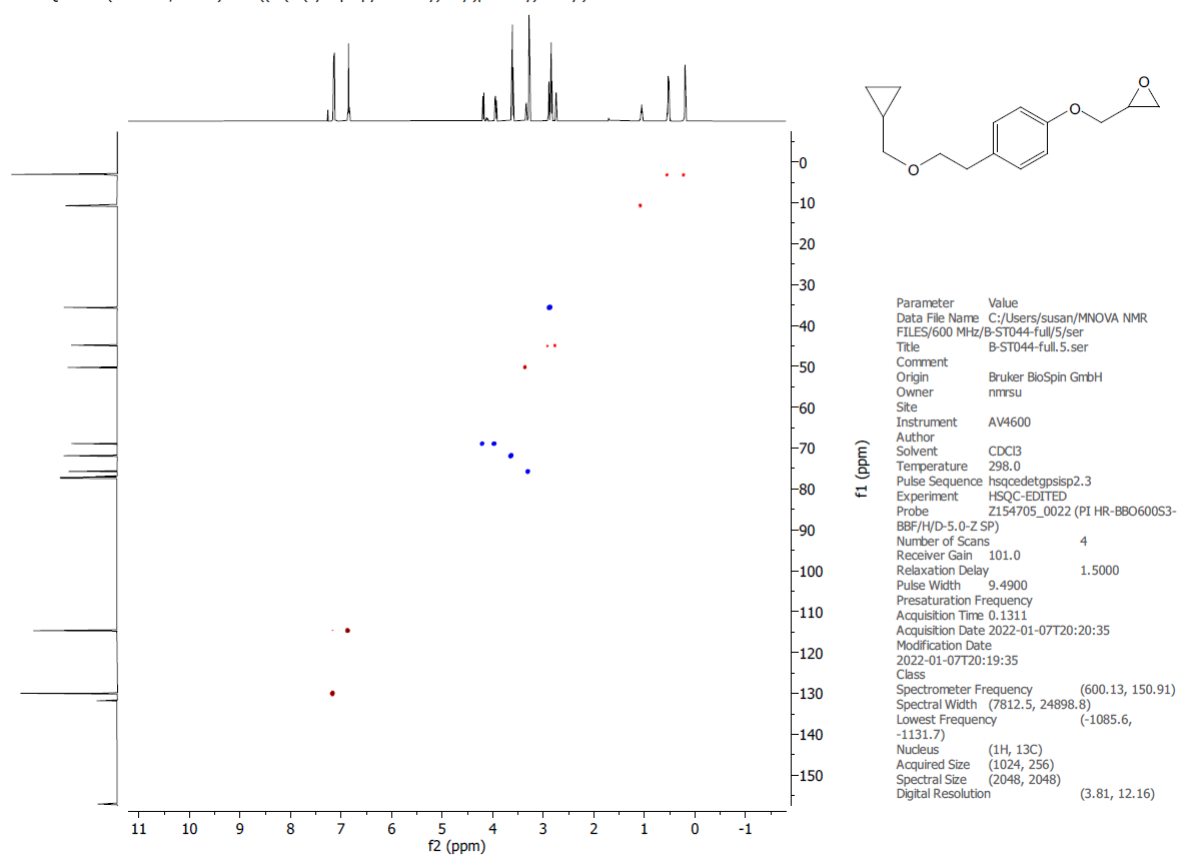

**Figure S12.** HSQC NMR spectrum (600 MHz, CDCl<sub>3</sub>) of 2-((4-(2-(cyclopropylmethoxy)ethyl)phenoxy)-methyl)oxirane (**3**).

2-(4-(oxiran-2-ylmethoxy)phenyl)ethan-1-ol (**4**)

<sup>1</sup>H NMR (600 MHz, CDCl<sub>3</sub>) of 2-(4-(oxiran-2-ylmethoxy)phenyl)ethan-1-ol

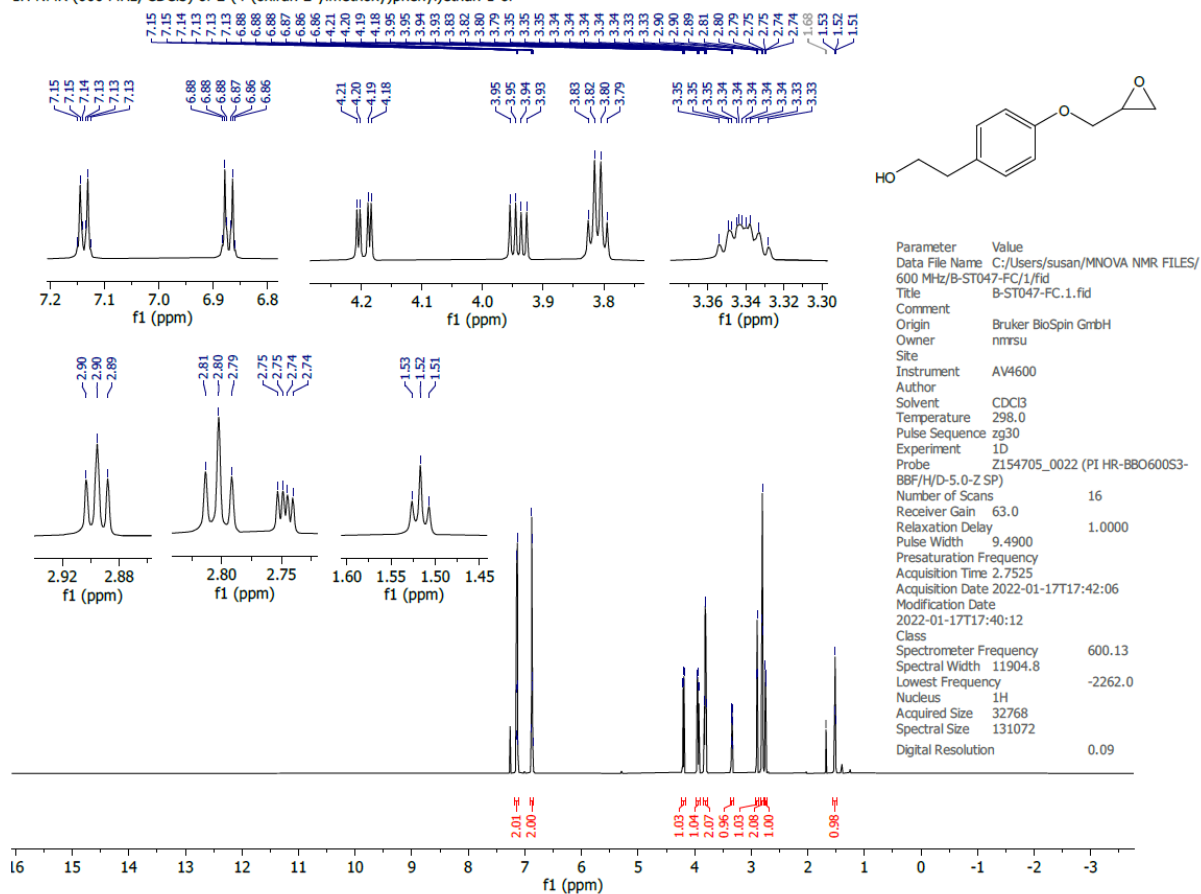

**Figure S13.** <sup>1</sup>H NMR spectrum (600 MHz, CDCl<sub>3</sub>) of 2-(4-(oxiran-2-ylmethoxy)phenyl)ethan-1-ol (**4**).

<sup>13</sup>C NMR (600 MHz, CDCl<sub>3</sub>) of 2-(4-(oxiran-2-ylmethoxy)phenyl)ethan-1-ol

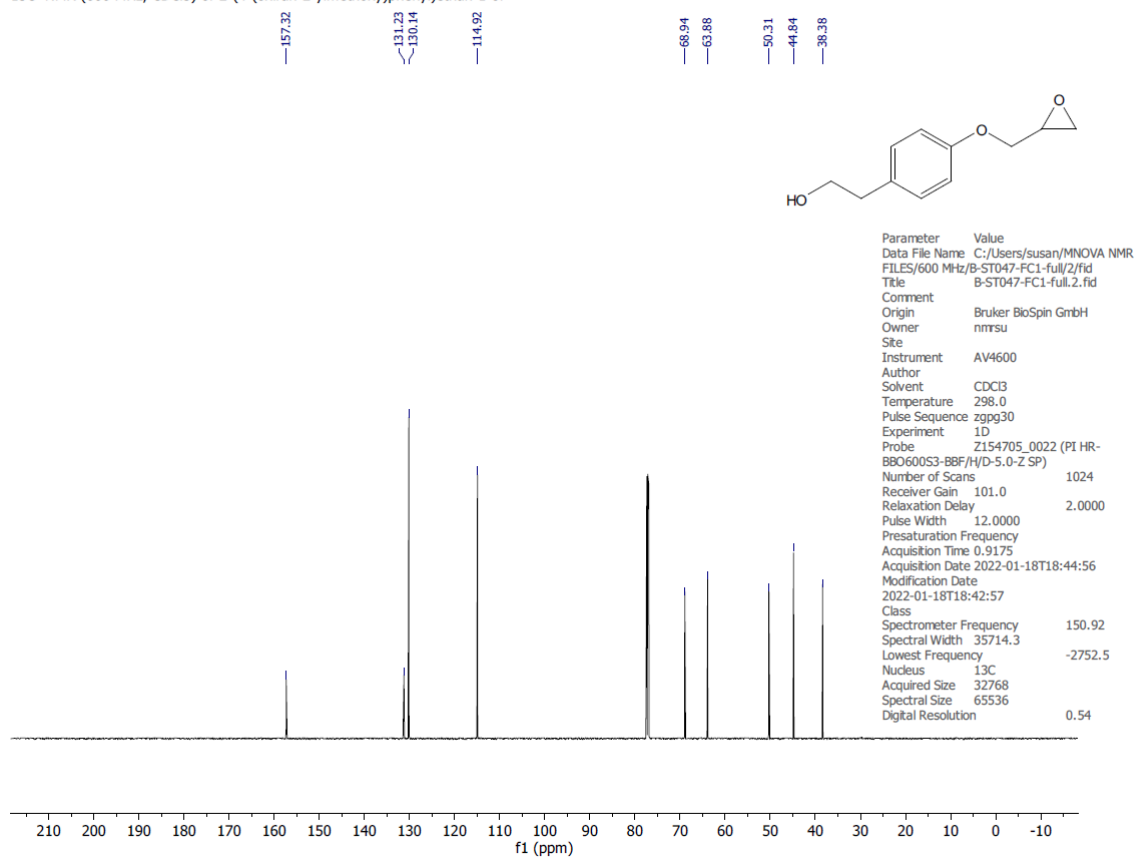

**Figure S14.** <sup>13</sup>C NMR spectrum (150 MHz, CDCl<sub>3</sub>) of 2-(4-(oxiran-2-ylmethoxy)phenyl)ethan-1-ol (**4**).

H-H COSY NMR (600 MHz, CDCl<sub>3</sub>) of 2-(4-(oxiran-2-ylmethoxy)phenyl)ethan-1-ol

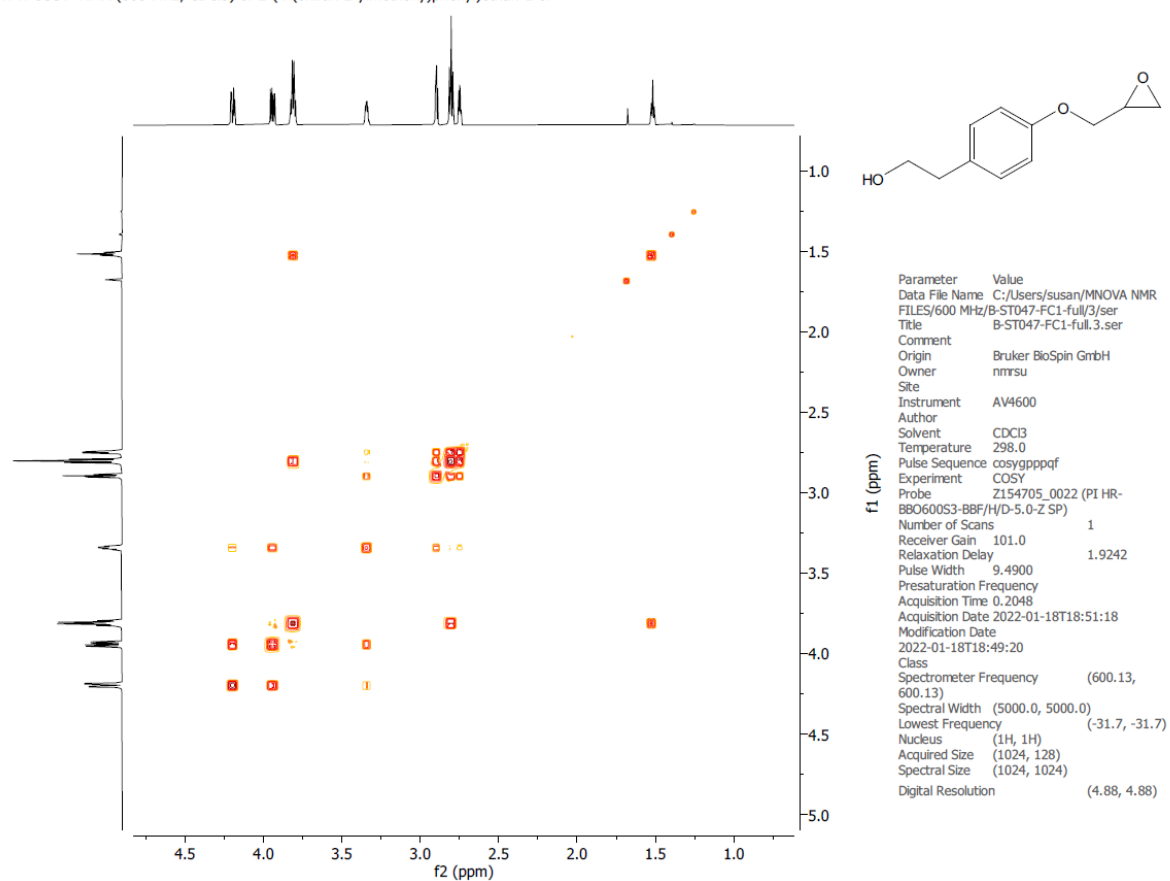

**Figure S15.** COSY NMR spectrum (600 MHz, CDCl<sub>3</sub>) of 2-(4-(oxiran-2-ylmethoxy)phenyl)ethan-1-ol (4).

HMBC NMR (600 MHz, CDCl<sub>3</sub>) of 2-(4-(oxiran-2-ylmethoxy)phenyl)ethan-1-ol

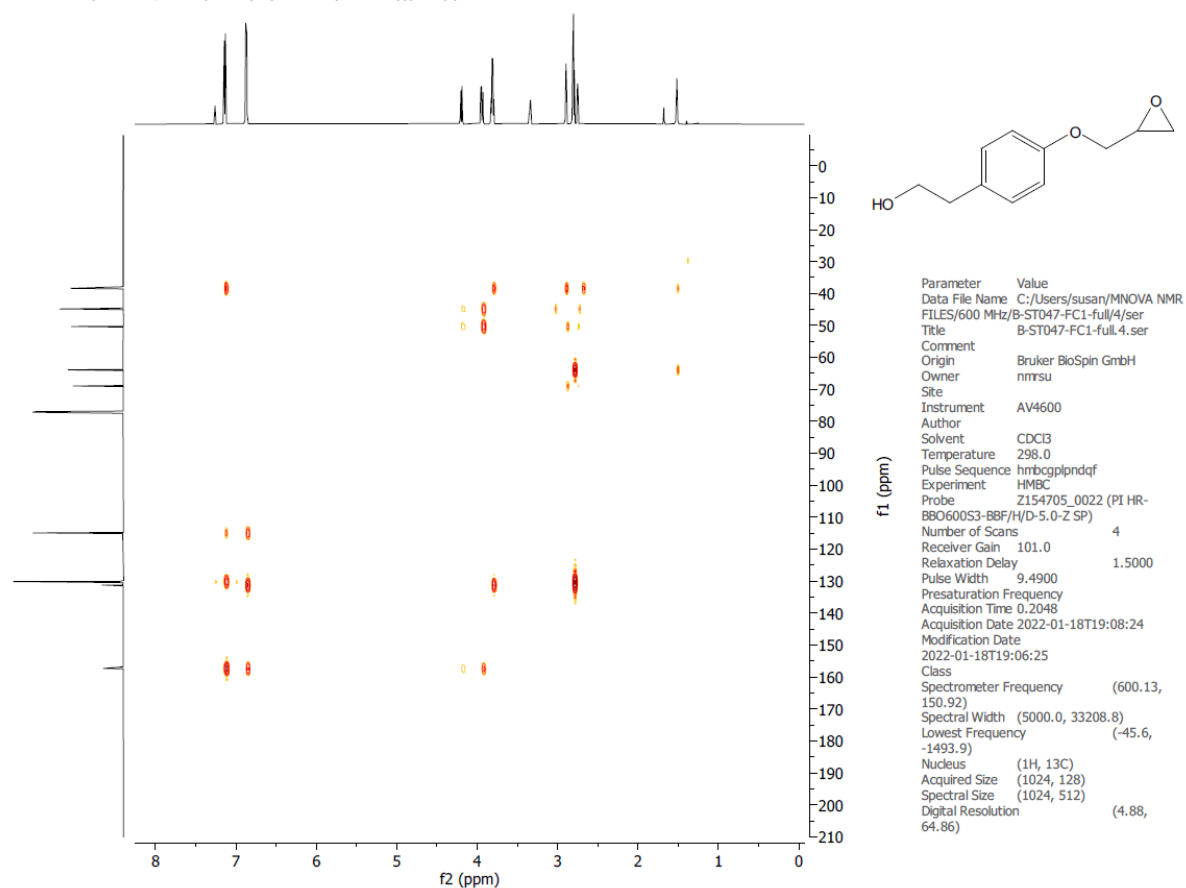

**Figure S16.** HMBC NMR spectrum (600 MHz, CDCl<sub>3</sub>) of 2-(4-(oxiran-2-ylmethoxy)phenyl)ethan-1-ol (**4**).

2,2'-(((2-Hydroxypropane-1,3-diyl)bis(oxy)))bis(4,1-phenylene))bis(ethan-1-ol)

<sup>1</sup>H NMR (600 MHz, CDCl<sub>3</sub>) of 2,2'-(((2-hydroxypropane-1,3-diyl)bis(oxy)))bis(4,1-phenylene))bis(ethan-1-ol)

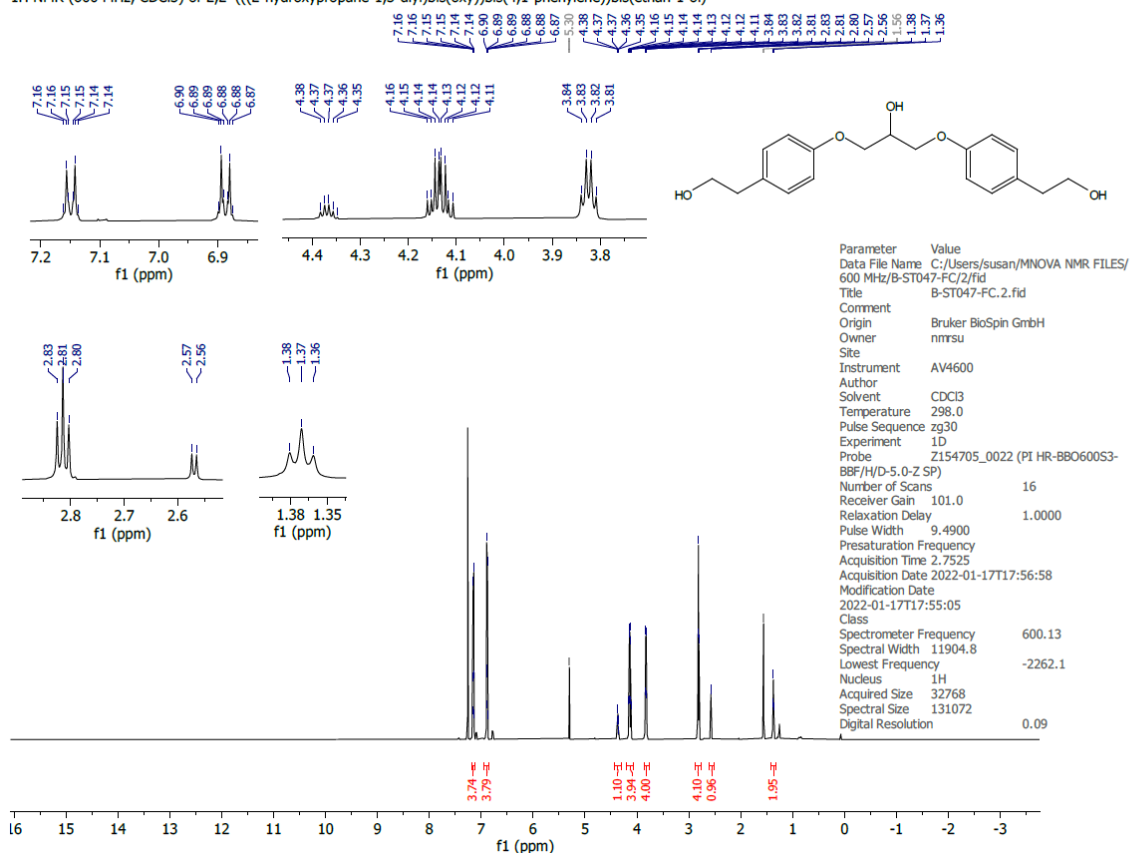

**Figure S17.** <sup>1</sup>H NMR spectrum (600 MHz, CDCl<sub>3</sub>) of 2,2'-(((2-hydroxypropane-1,3-diyl)bis(oxy)))bis(4,1-phenylene))bis(ethan-1-ol).

1-chloro-3-(4-(2-(cyclopropylmethoxy)ethyl)phenoxy)propan-2-ol (**5a**)

<sup>1</sup>H NMR (600 MHz, CDCl<sub>3</sub>) of 1-chloro-3-(4-(2-(cyclopropylmethoxy)ethyl)phenoxy)propan-2-ol

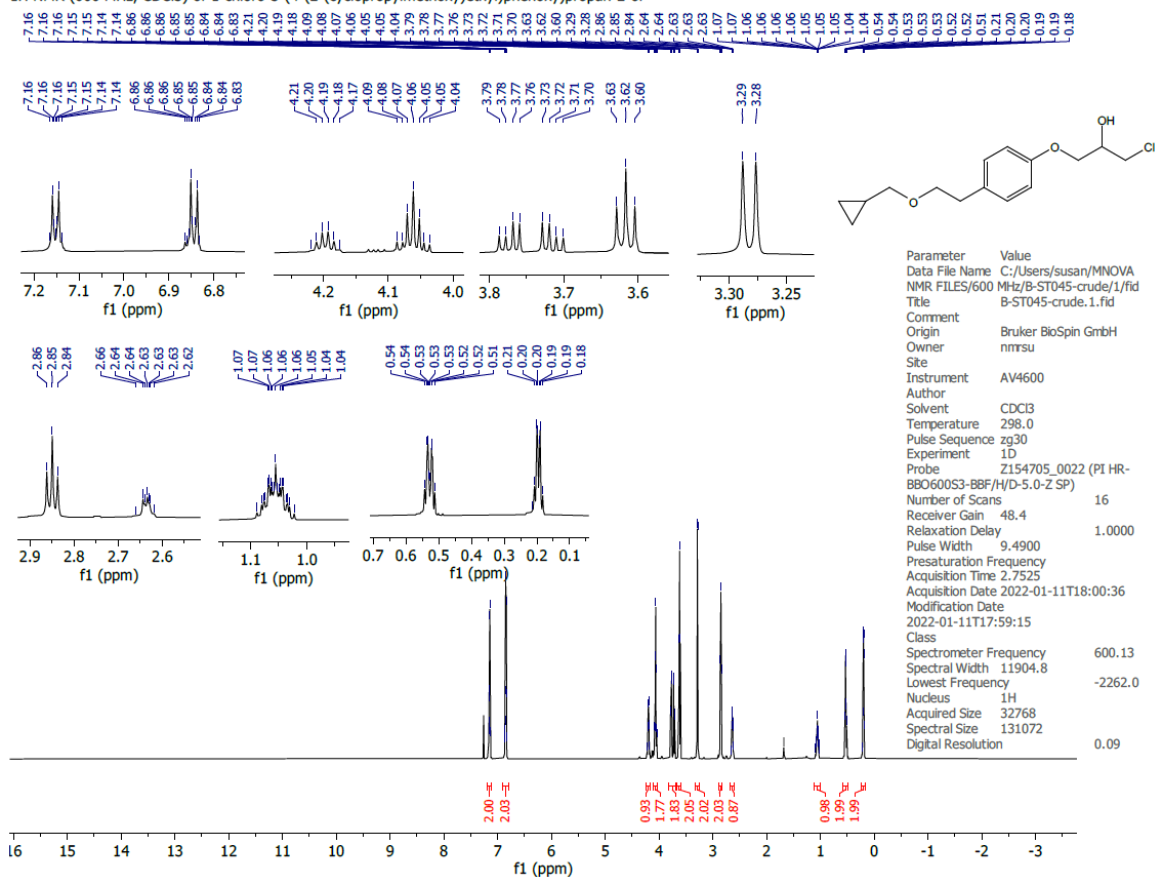

**Figure S18.** <sup>1</sup>H NMR spectrum (600 MHz, CDCl<sub>3</sub>) of 1-chloro-3-(4-(2-(cyclopropylmethoxy)ethyl)phenoxy)propan-2-ol (**5a**).

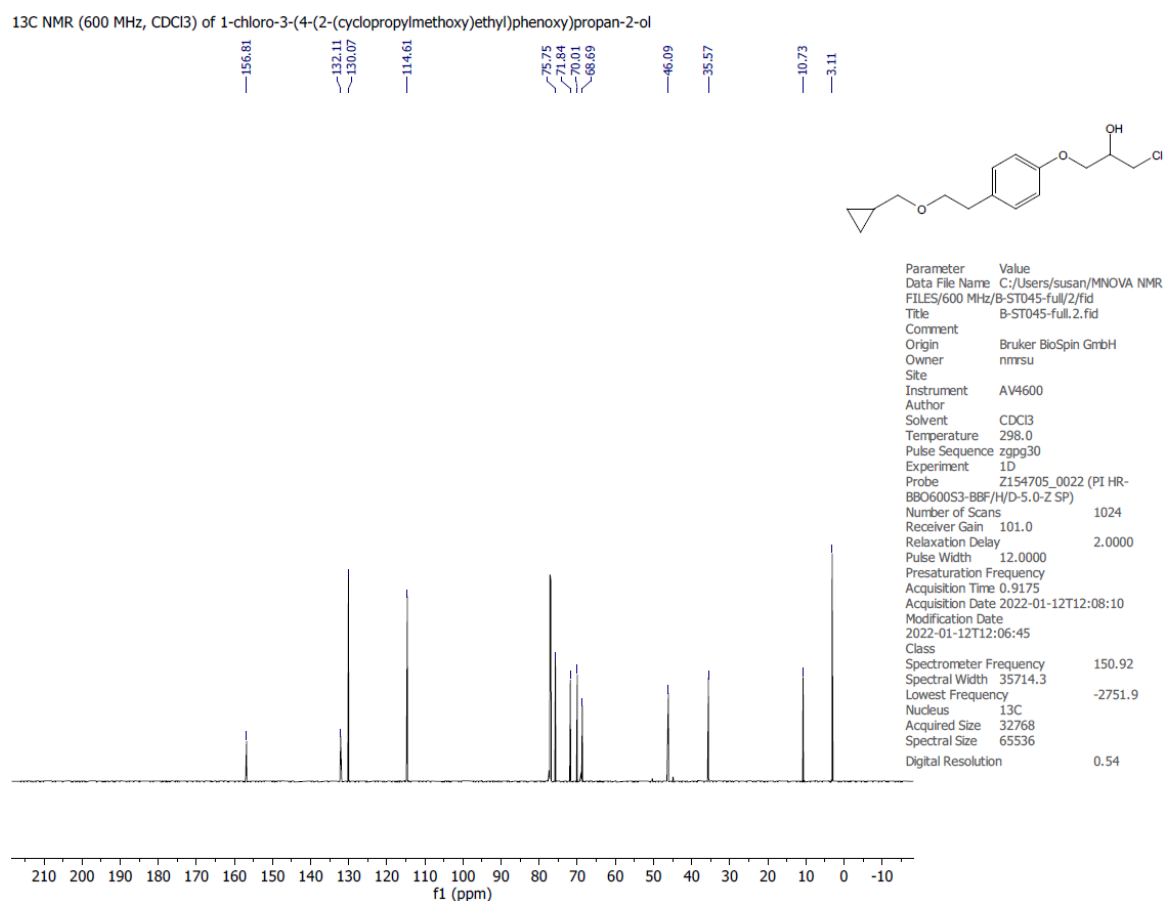

**Figure S19.** <sup>13</sup>C NMR spectrum (150 MHz, CDCl<sub>3</sub>) of 1-chloro-3-(4-(2-(cyclopropylmethoxy)ethyl)phenoxy)propan-2-ol (**5a**).

H-H COSY NMR (600 MHz, CDCl<sub>3</sub>) of 1-chloro-3-(4-(2-(cyclopropylmethoxy)ethyl)phenoxy)propan-2-ol

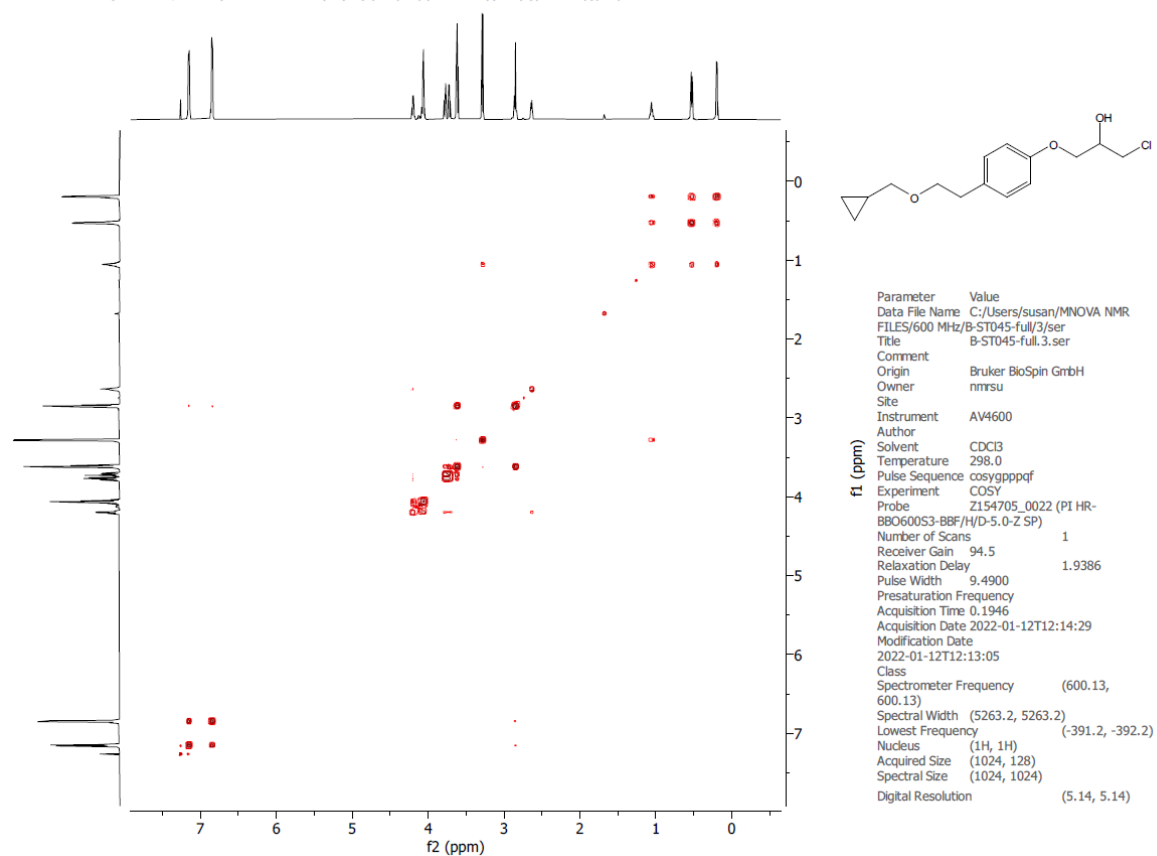

**Figure S20.** COSY NMR spectrum (600 MHz, CDCl<sub>3</sub>) of 1-chloro-3-(4-(2-(cyclopropylmethoxy)ethyl)phenoxy)propan-2-ol (**5a**).

HMBC NMR (600 MHz, CDCl<sub>3</sub>) of 1-chloro-3-(4-(2-(cyclopropylmethoxy)ethyl)phenoxy)propan-2-ol

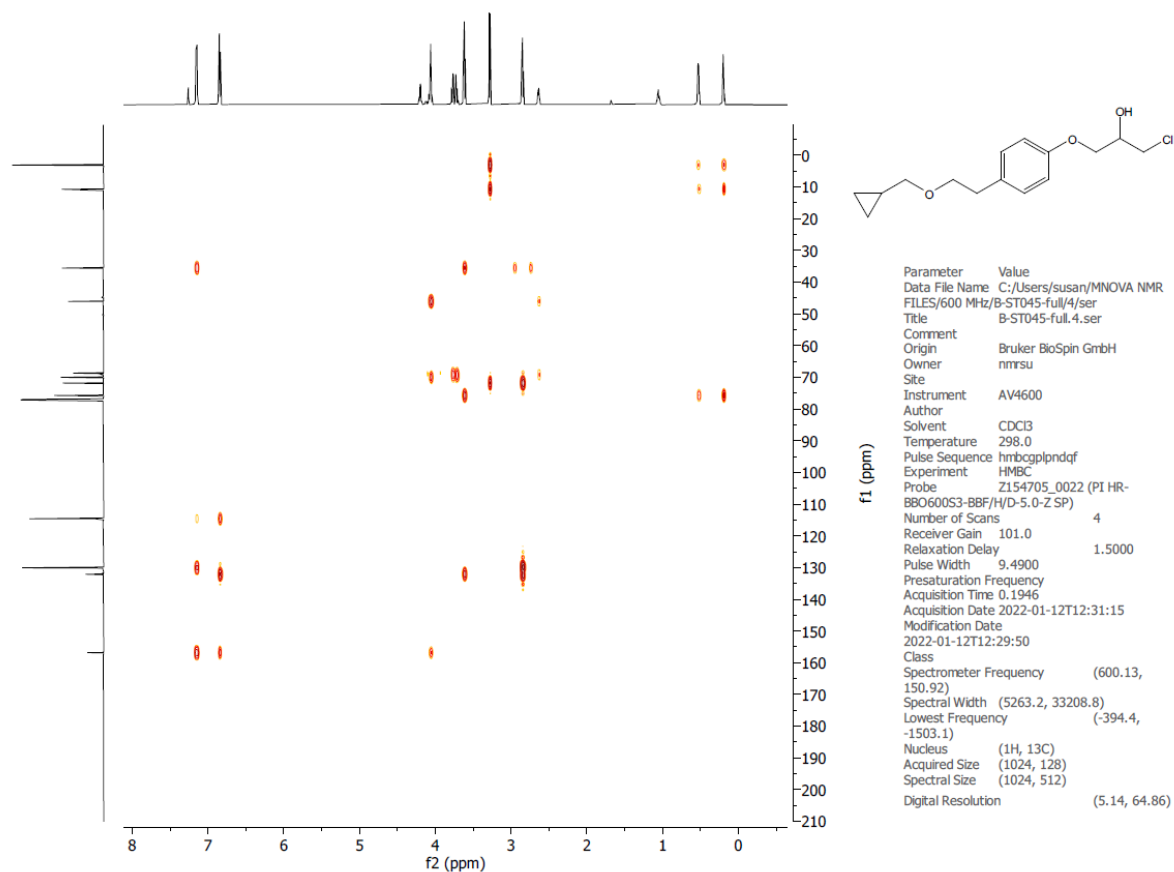

**Figure S21.** HMBC NMR spectrum (600 MHz, CDCl<sub>3</sub>) of 1-chloro-3-(4-(2-(cyclopropylmethoxy)ethyl)phenoxy)propan-2-ol (**5a**).

HSQC NMR (600 MHz, CDCl<sub>3</sub>) of 1-chloro-3-(4-(2-(cyclopropylmethoxy)ethyl)phenoxy)propan-2-ol

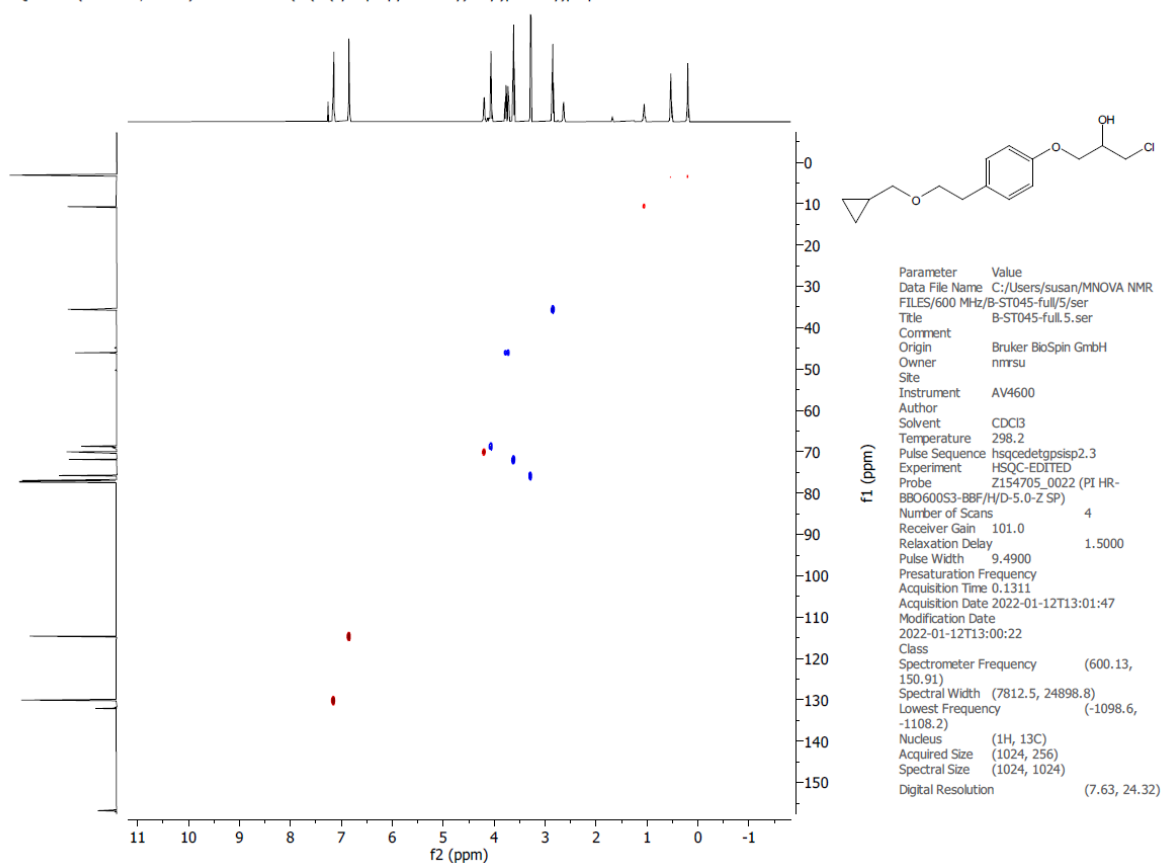

**Figure S22.** HSQC NMR spectrum (600 MHz, CDCl<sub>3</sub>) of 1-chloro-3-(4-(2-(cyclopropylmethoxy)ethyl)phenoxy)propan-2-ol (**5a**).

<sup>1</sup>H NMR (600 MHz, CDCl<sub>3</sub>) of 2-1-bromo-3-(4-(2-(cyclopropyl-methoxy)ethyl)phenoxy)propan-2-ol

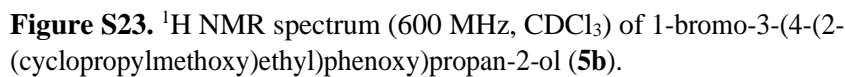

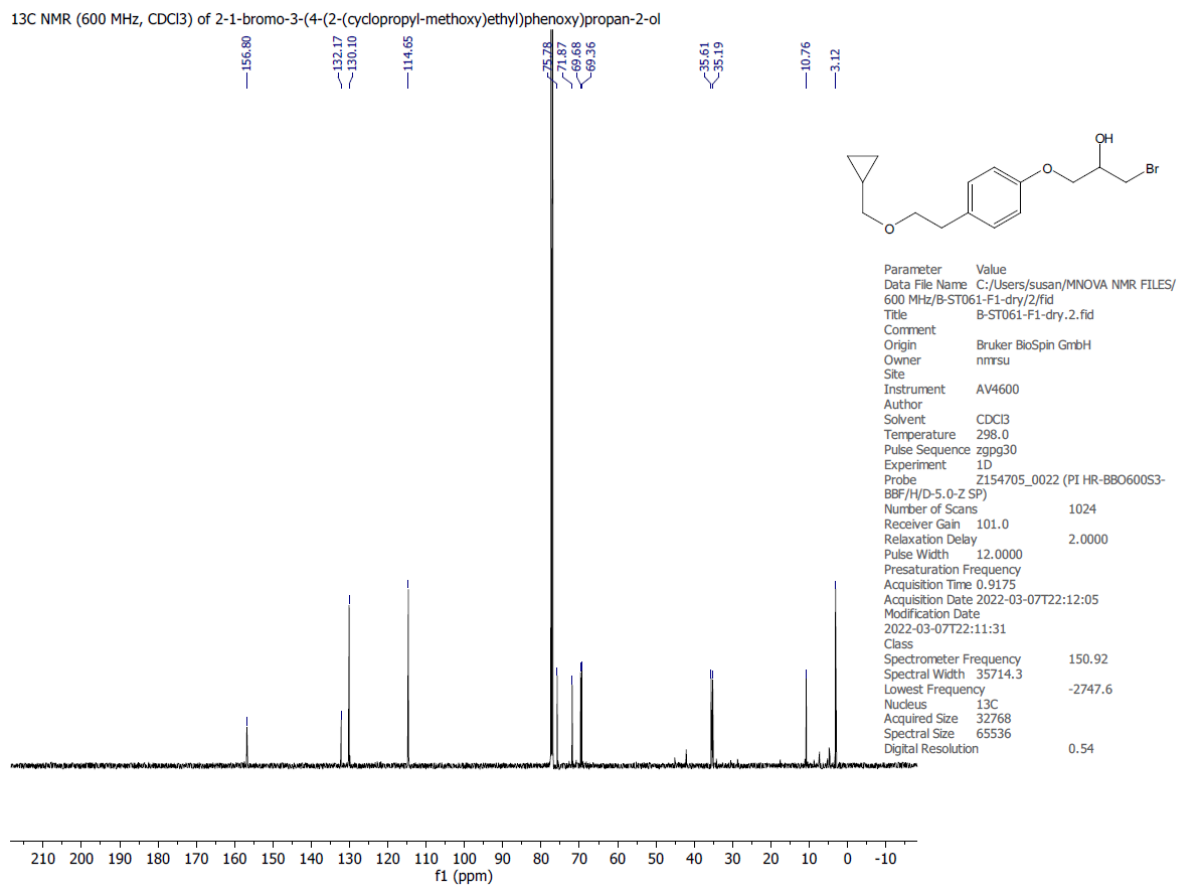

**Figure S24.** <sup>13</sup>C NMR spectrum (150 MHz, CDCl<sub>3</sub>) of 1-bromo-3-(4-(2-(cyclopropylmethoxy)ethyl)phenoxy)propan-2-ol (**5b**).

*1-chloro-3-(4-(2-(cyclopropylmethoxy)ethyl)phenoxy)propan-2-yl butanoate, 6a*

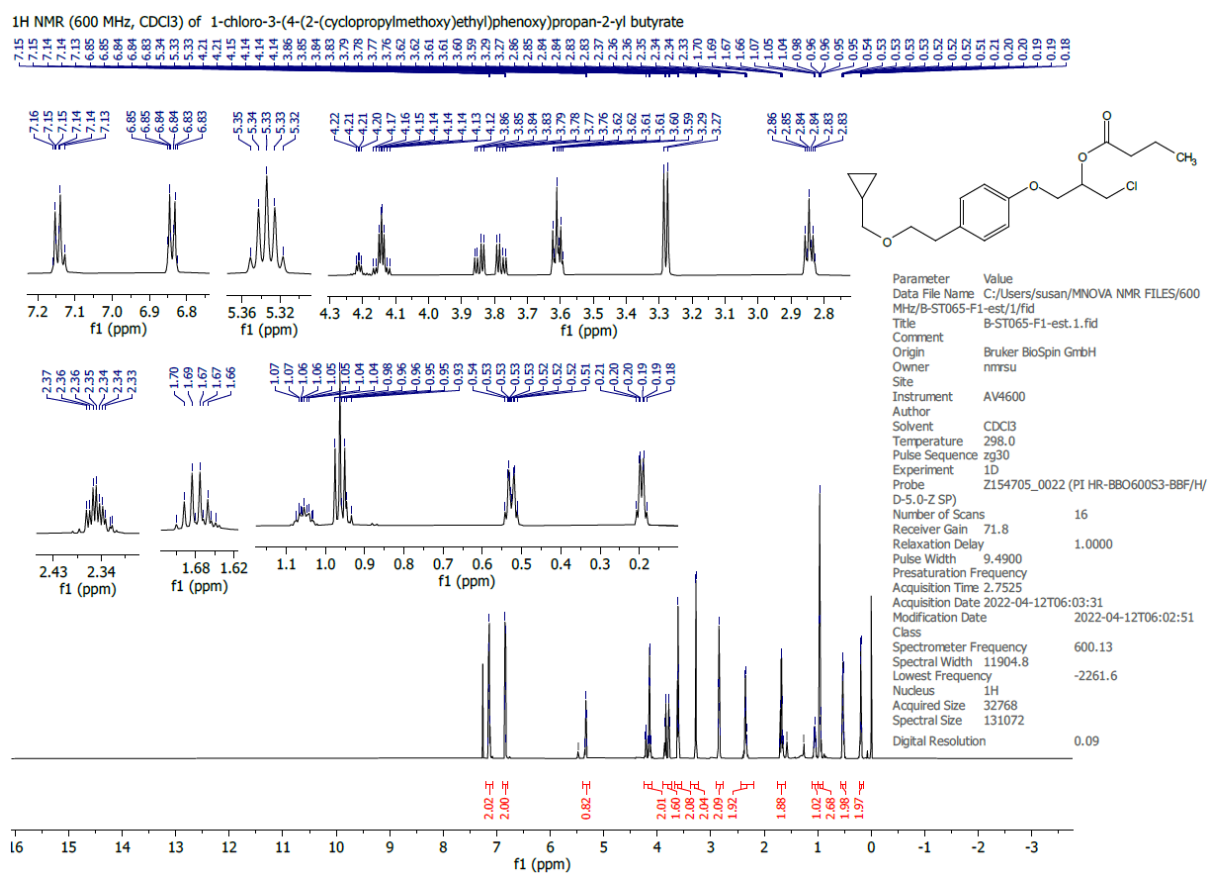

**Figure S25.** <sup>1</sup>H NMR spectrum (600 MHz, CDCl<sub>3</sub>) of 1-chloro-3-(4-(2-(cyclopropylmethoxy)ethyl)phenoxy)propan-2-yl butanoate (**6a**).

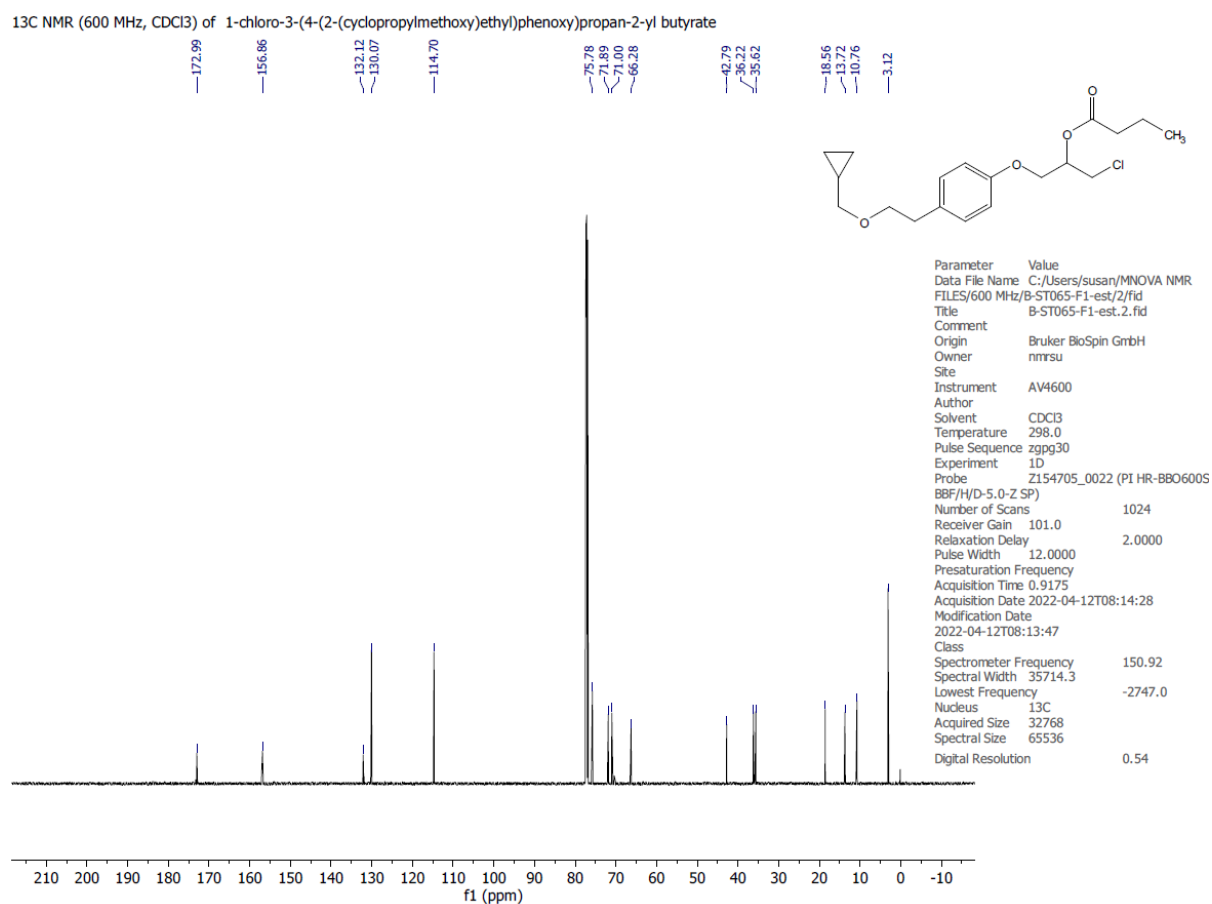

**Figure S26.** <sup>13</sup>C NMR spectrum (150 MHz, CDCl<sub>3</sub>) of 1-chloro-3-(4-(2-(cyclopropylmethoxy)ethyl)phenoxy)propan-2-yl butanoate (**6a**).

H-H COSY NMR (600 MHz, CDCl<sub>3</sub>) of 1-chloro-3-(4-(2-(cyclopropylmethoxy)ethyl)phenoxy)propan-2-yl butyrate

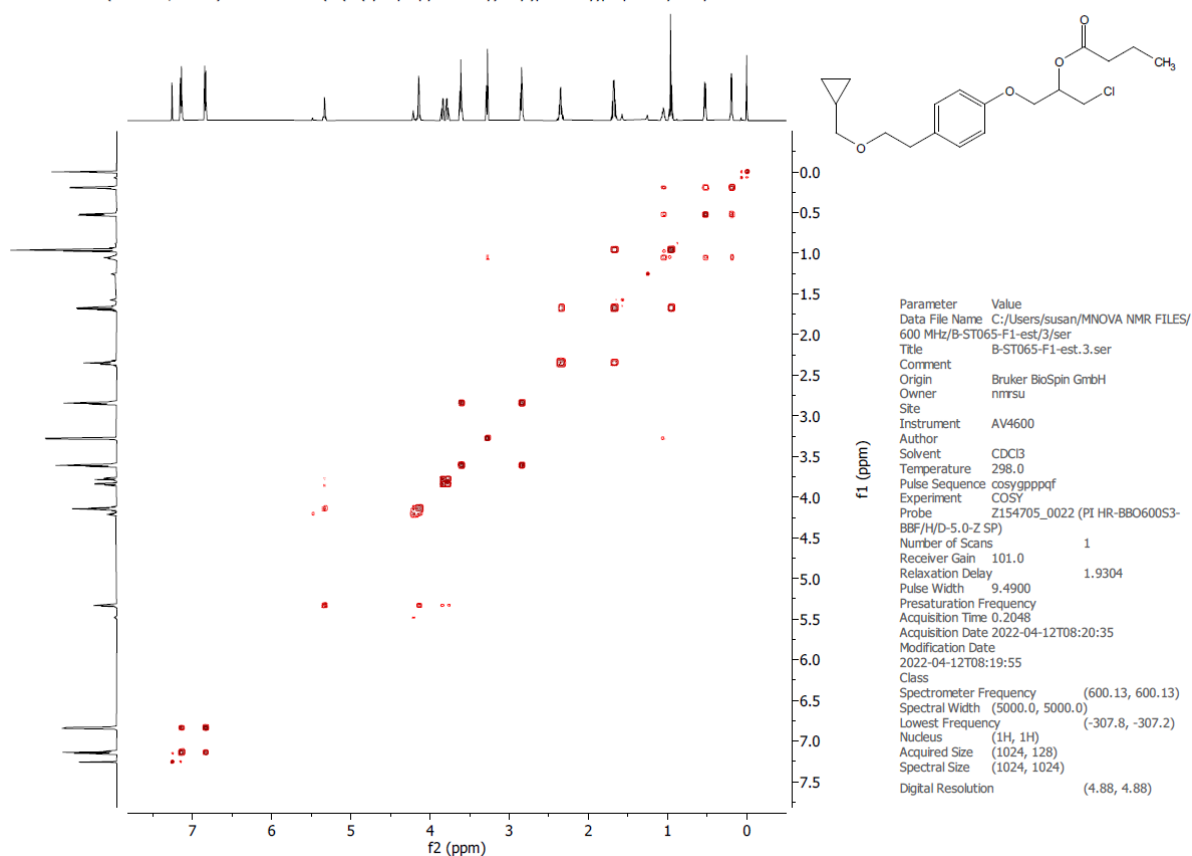

**Figure S27.** COSY NMR spectrum (600 MHz, CDCl<sub>3</sub>) of 1-chloro-3-(4-(2-(cyclopropylmethoxy)ethyl)phenoxy)propan-2-yl butanoate (**6a**).

C-H HMBC NMR (600 MHz, CDCl<sub>3</sub>) of 1-chloro-3-(4-(2-(cyclopropylmethoxy)ethyl)phenoxy)propan-2-yl butyrate

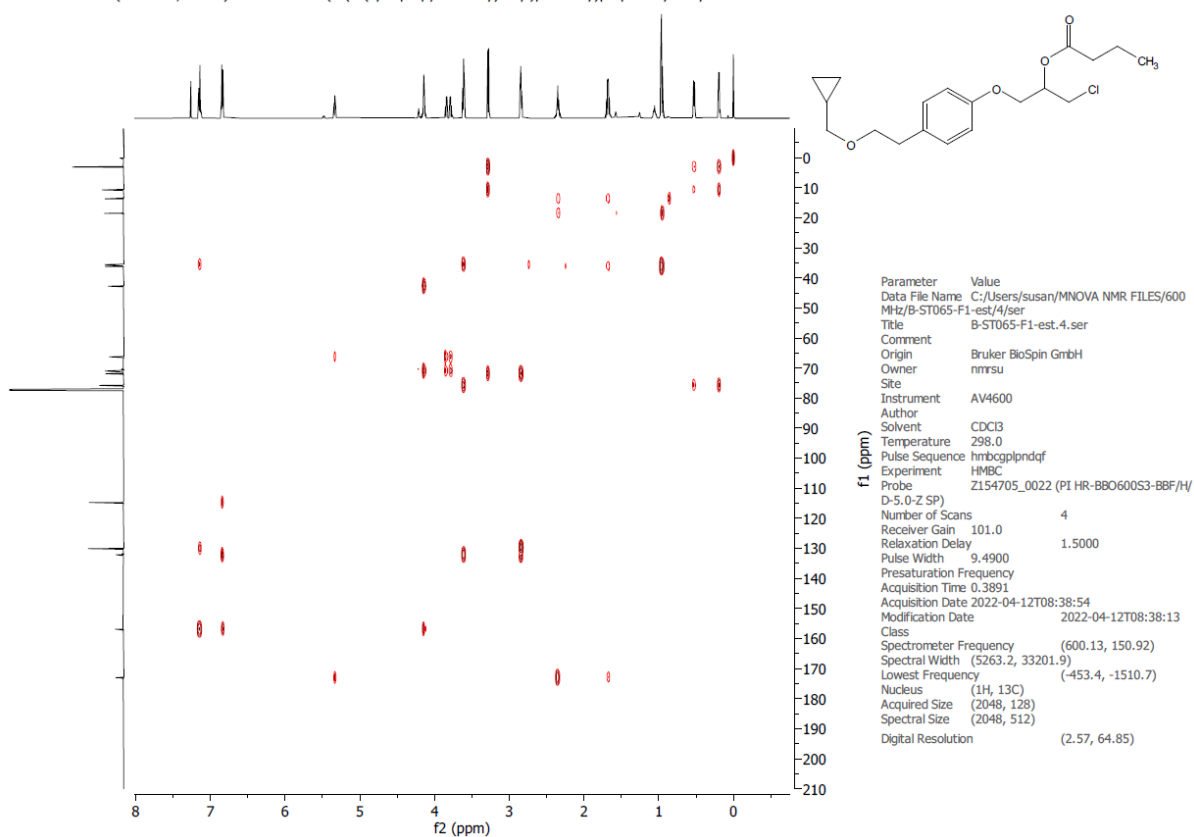

**Figure S28.** HMBC NMR spectrum (600 MHz, CDCl<sub>3</sub>) of 1-chloro-3-(4-(2-(cyclopropylmethoxy)ethyl)phenoxy)propan-2-yl butanoate (**6a**).

C-H HSQC NMR (600 MHz, CDCl<sub>3</sub>) of 1-chloro-3-(4-(2-(cyclopropylmethoxy)ethyl)phenoxy)propan-2-yl butyrate

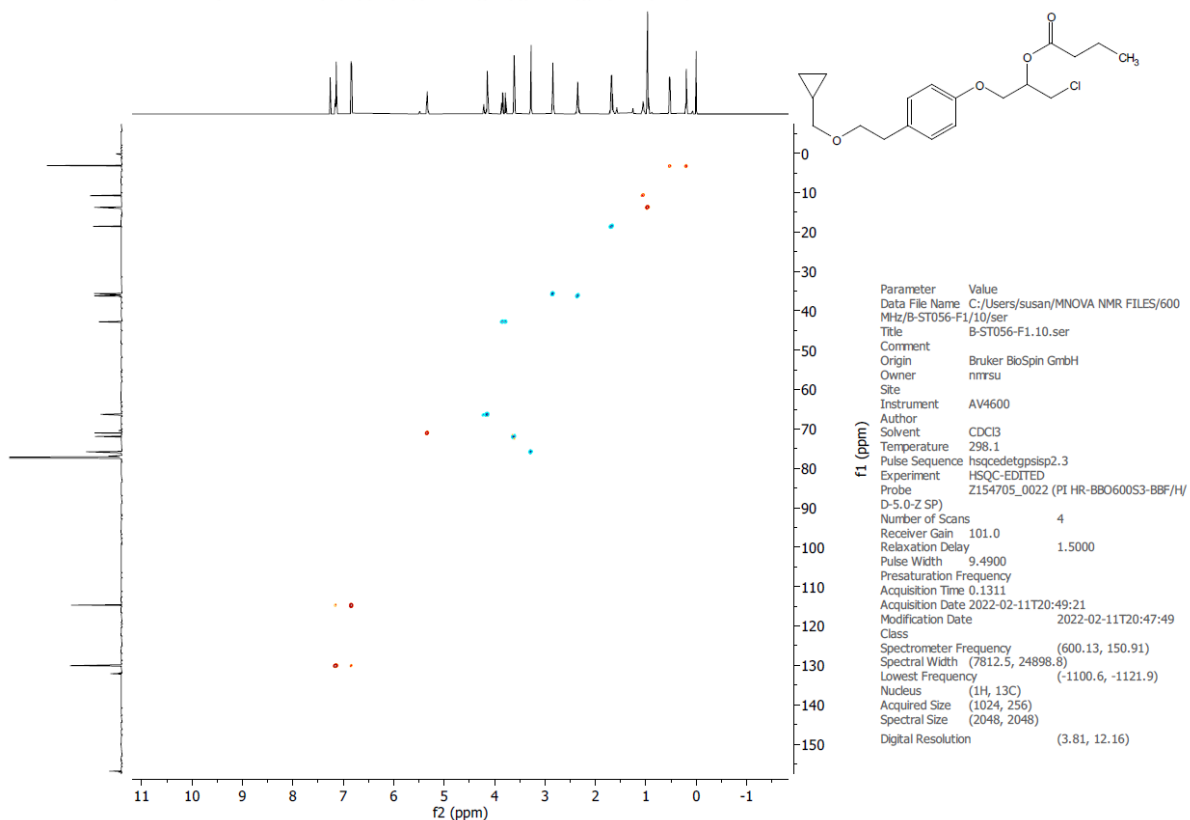

**Figure S29.** HSQC NMR spectrum (600 MHz, CDCl<sub>3</sub>) of 1-chloro-3-(4-(2-(cyclopropylmethoxy)ethyl)phenoxy)propan-2-yl butanoate (**6a**).

<sup>1</sup>H NMR (600 MHz, CDCl<sub>3</sub>) of betaxolol

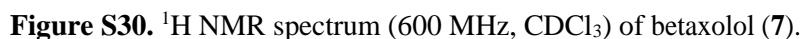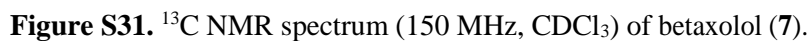

H-H COSY NMR (600 MHz, CDCl<sub>3</sub>) of betaxolol

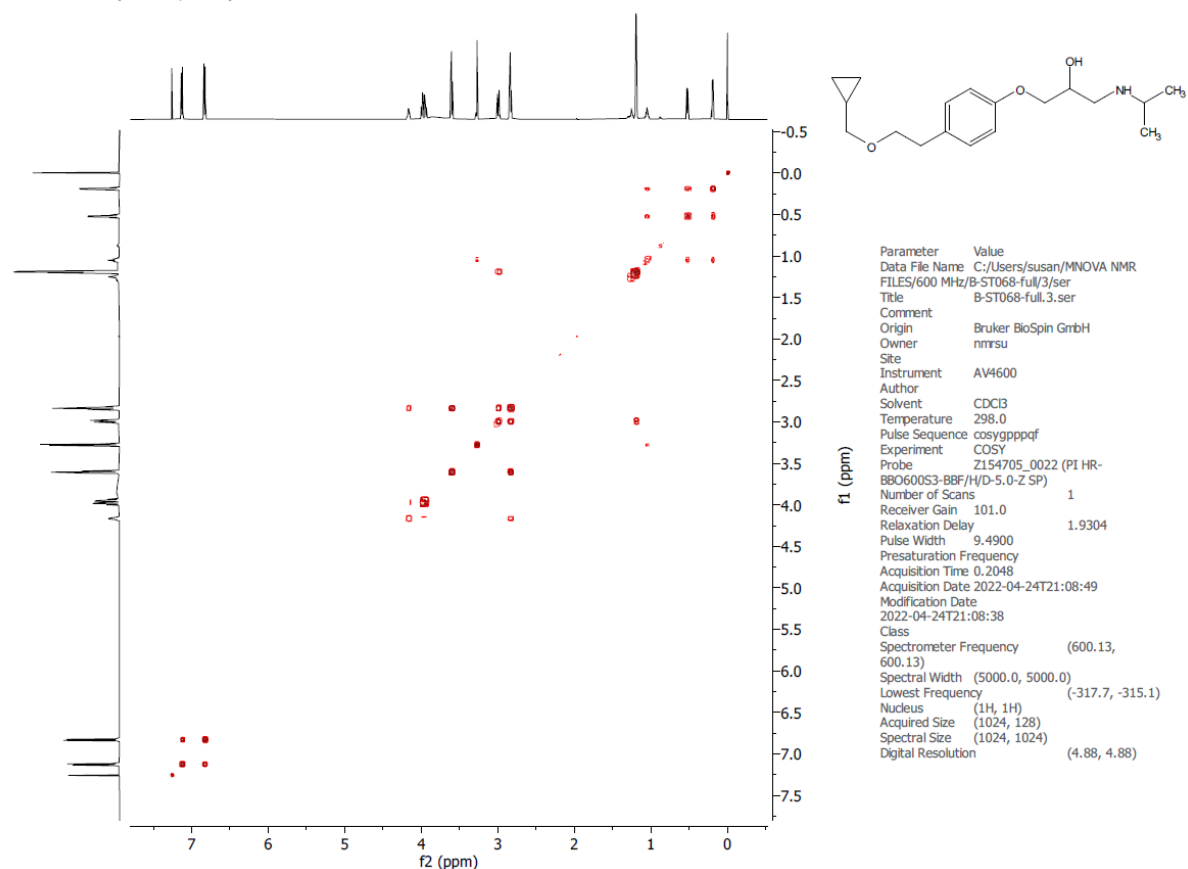

**Figure S32.** COSY NMR spectrum (600 MHz, CDCl<sub>3</sub>) of betaxolol (**7**).

C-H HMBC NMR (600 MHz, CDCl<sub>3</sub>) of betaxolol

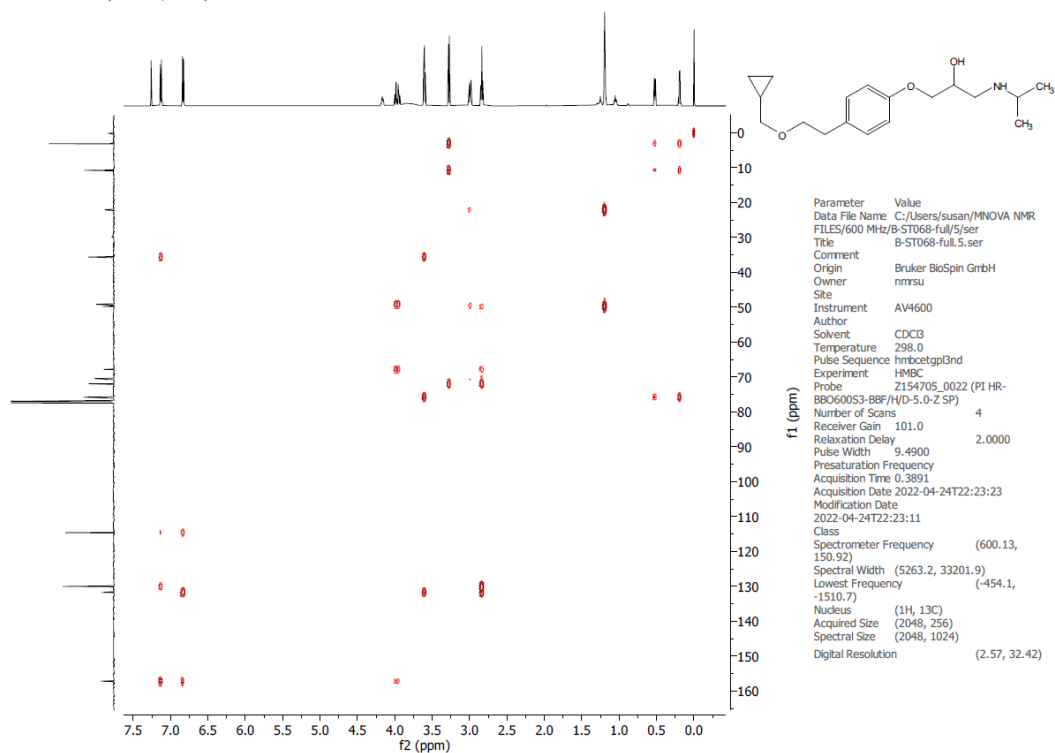

**Figure S33.** HMBC NMR spectrum (600 MHz, CDCl<sub>3</sub>) of betaxolol (**7**).

C-H HSQC NMR (600 MHz, CDCl<sub>3</sub>) of betaxolol

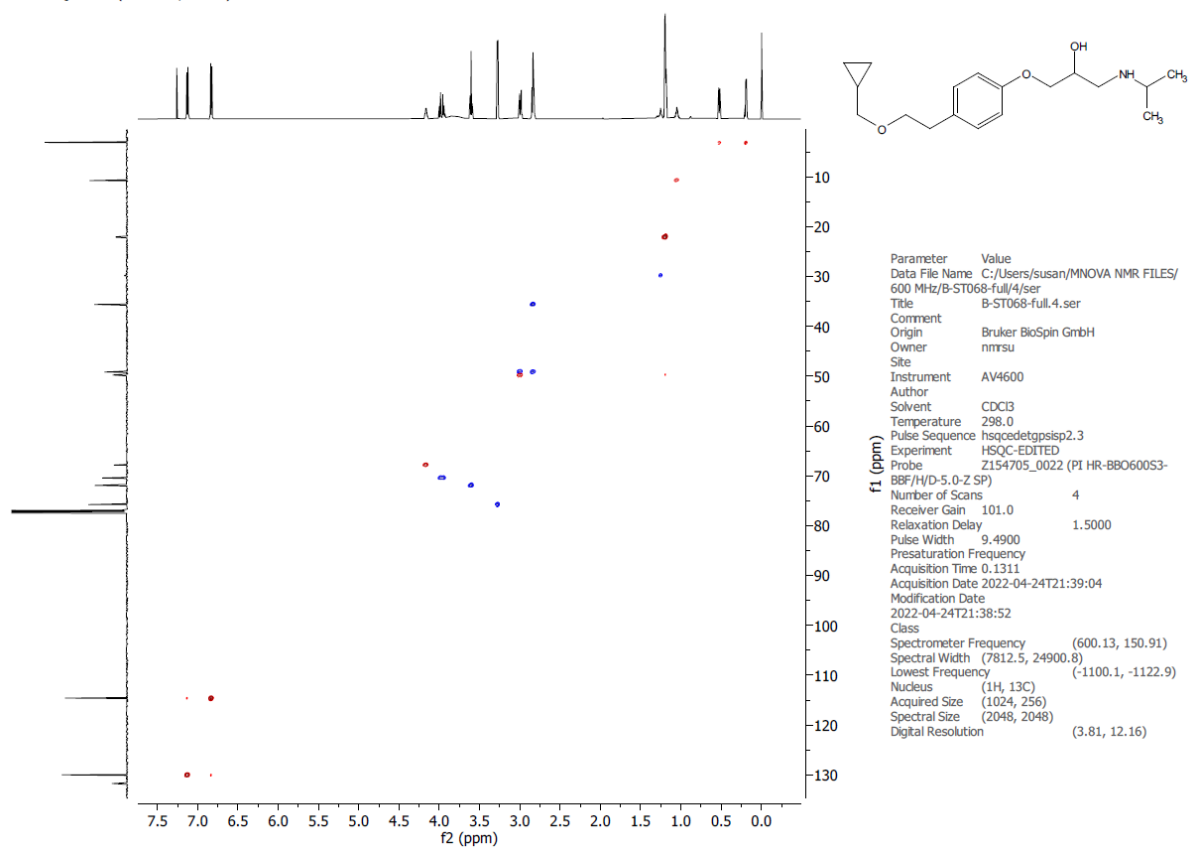

**Figure S34.** HSQC NMR spectrum (600 MHz, CDCl<sub>3</sub>) of betaxolol (**7**).

## LC-MS DATA

### *1-bromo-3-(4-(2-(cyclopropylmethoxy)ethyl)phenoxy)propan-2-ol (5b)*

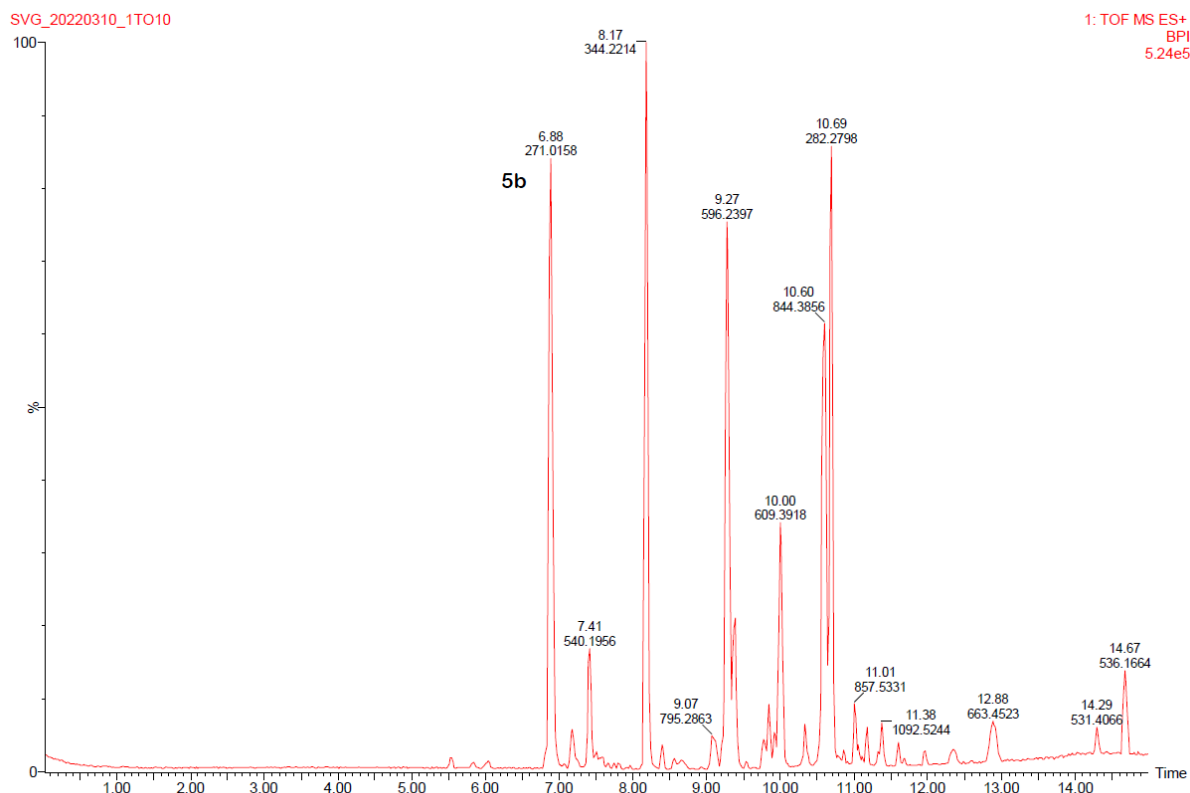

**Figure S35.** LC-MS chromatogram of 1-bromo-3-(4-(2-(cyclopropylmethoxy)ethyl)phenoxy)propan-2-ol (**5b**). Performed on an ACQUITY UPLC HSS T3 column (100 mm x 2.1 mm ID, 100 Å x 1.8 µm film thickness) with a mobile phase of A: water with 0.12% NH<sub>4</sub>OH and B: MeCN, flow rate: 0.25 mL min<sup>-1</sup>. The analyses were run with a gradient of 10-100% B for 12 min, 2 min hold, then 100-10% B for 1 min. Total time 15.0 min. Quadrupole time of flight mass analyzer (QTOF; SYNAPT-G2S) with a ZSpray EIS ion source (Waters, Milford, USA).

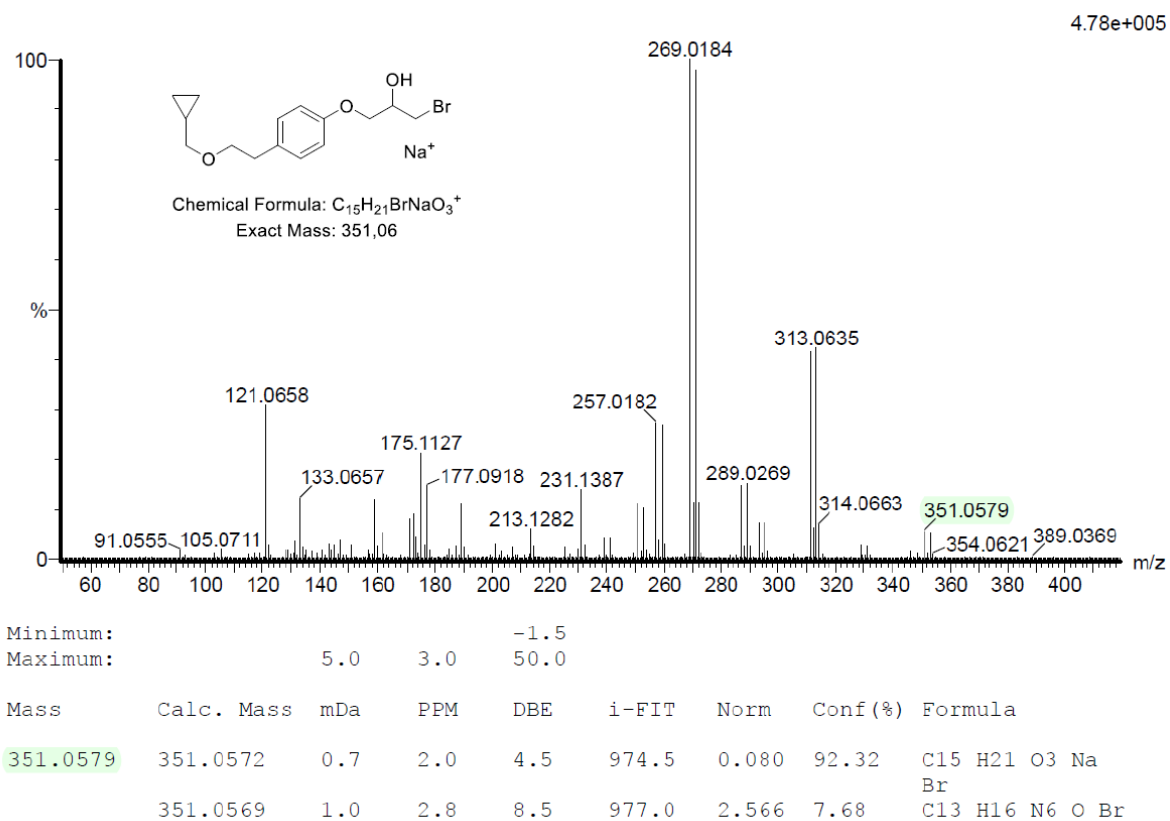

**Figure S36.** TOF MS ES<sup>+</sup> spectrum for 5b with  $m/z = 351.0572$   $[M+Na]^+$ , from LC-MS analysis shown in Figure S18, at  $t_R = 6.9$  min.

## CHIRAL HPLC DATA

### 2-((4-(2-(Cyclopropylmethoxy)ethyl)phenoxy)-methyl)oxirane (**3**)

Data File C:\CHEM32\...SEN TROØYEN\20220214\_B-ST056\_B-ST044 2022-02-14 11-38-40\001-0101.D  
Sample Name: B-ST044-epoxide

```
=====
Acq. Operator   : Susanne                      Seq. Line :    1
Acq. Instrument : Instrument 1                  Location  : Vial 1
Injection Date  : 14.02.2022 11:58:53          Inj       :    1
                                           Inj Volume: 10 µl
Acq. Method     : C:\Chem32\1\DATA\SUSANNE HANSEN TROØYEN\20220214_B-ST056_B-ST044 2022-02-14
                                           11-38-40\KIRAL_SHT_1.M
Last changed    : 14.02.2022 11:38:23 by Susanne
Analysis Method : C:\CHEM32\1\DATA\SUSANNE HANSEN TROØYEN\20220214_B-ST056_B-ST044 2022-02-14
                                           11-38-40\001-0101.D\DA.M (KIRAL_SHT_1.M)
Last changed    : 05.04.2022 05:27:00 by Lucas
Method Info     : Kiral separasjon med Chiralcel OD-H kolonne 250x4.6mm, 5µm
                                           Solventer: Heksan + ipa
=====
```

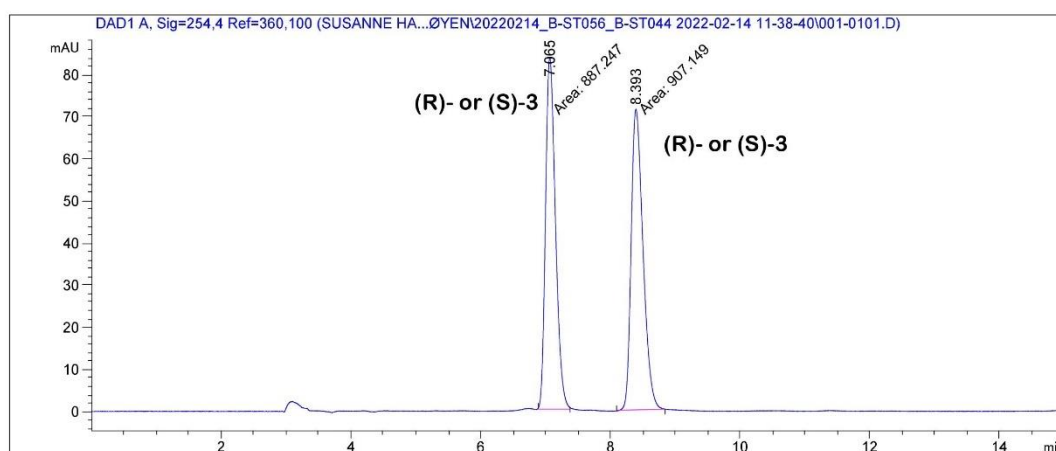

#### Area Percent Report

```
=====
Sorted By      : Signal
Multiplier     : 1.0000
Dilution       : 1.0000
Use Multiplier & Dilution Factor with ISTDs
=====
```

Signal 1: DAD1 A, Sig=254,4 Ref=360,100

| Peak # | RetTime [min] | Type | Width [min] | Area [mAU*s] | Height [mAU] | Area %  |
|--------|---------------|------|-------------|--------------|--------------|---------|
| 1      | 7.065         | MM   | 0.1769      | 887.24689    | 83.58057     | 49.4454 |
| 2      | 8.393         | MM   | 0.2115      | 907.14948    | 71.47255     | 50.5546 |

Totals : 1794.39636 155.05312

\*\*\* End of Report \*\*\*

**Figure S37.** Chiral HPLC chromatogram of **3**. The analysis was performed on a Chiralcel OD-H column with *n*-hexane and *i*-PrOH (90:10) as eluent and 1 mL/min flow, and with a

detection wavelength of 254 nm. The retention times obtained are  $t_R((S)\text{-}\mathbf{3}) = 9.4$  min and  $t_R((R)\text{-}\mathbf{3}) = 7.1$  min.

### 1-Chloro-3-(4-(2-(cyclopropylmethoxy)ethyl)phenoxy)propan-2-ol (**5a**)

Data File C:\CHEM32\1\DATA\SUSANNE HANSEN TROØYEN\20220119\_B-ST045\_RACEMIC\_CHLOROHYDRIN.D  
Sample Name: Racemic chlorohydrin

```
=====
Acq. Operator   : Susanne
Acq. Instrument : Instrument 1                      Location : Vial 3
Injection Date  : 19.01.2022 11:17:33              Inj Volume : 10 µl
                                                    Inj Volume : 10 µl
Acq. Method     : C:\CHEM32\1\METHODS\ELISABETH JACOBSEN\KIRAL_SHT_1.M
Last changed    : 19.01.2022 10:42:03 by Susanne
                  (modified after loading)
Analysis Method : C:\CHEM32\1\DATA\SUSANNE HANSEN TROØYEN\20220119_B-ST045_RACEMIC_
                  CHLOROHYDRIN.D\DA.M (KIRAL_SHT_1.M)
Last changed    : 05.04.2022 05:29:44 by Lucas
Method Info     : Kiral separasjon med Chiralcel OD-H kolonne 250x4.6mm, 5µm
                  Solventer: Heksan + ipa

Sample Info     : 90% n-hexane 10% IPA 1mL/min
=====
```

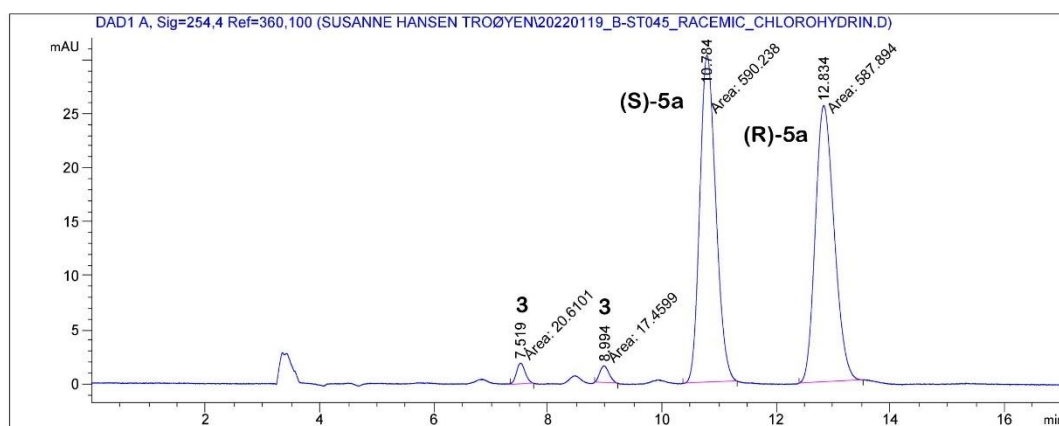

#### Area Percent Report

```
=====
Sorted By      : Signal
Multiplier     : 1.0000
Dilution       : 1.0000
Use Multiplier & Dilution Factor with ISTDs
=====
```

Signal 1: DAD1 A, Sig=254,4 Ref=360,100

| Peak # | RetTime [min] | Type | Width [min] | Area [mAU*s] | Height [mAU] | Area %  |
|--------|---------------|------|-------------|--------------|--------------|---------|
| 1      | 7.519         | MM   | 0.1778      | 20.61008     | 1.93238      | 1.6946  |
| 2      | 8.994         | MM   | 0.1877      | 17.45990     | 1.55045      | 1.4356  |
| 3      | 10.784        | MM   | 0.3249      | 590.23779    | 30.28229     | 48.5312 |
| 4      | 12.834        | MM   | 0.3828      | 587.89429    | 25.59438     | 48.3385 |

Totals : 1216.20205 59.35949

\*\*\* End of Report \*\*\*

**Figure S38.** Chiral HPLC chromatogram of **5a**. The analysis was performed on a Chiralcel OD-H column with *n*-hexane and *i*-PrOH (90:10) as eluent and 1 mL/min flow, and with a detection wavelength of 254 nm. The retention times obtained are  $t_R((S)\text{-5a}) = 10.8$  min,  $t_R((R)\text{-5a}) = 12.8$  min.

*(R)*-1-Chloro-3-(4-(2-(cyclopropylmethoxy)ethyl)phenoxy)propan-2-ol, (*R*)-**5a**

Data File C:\CHEM32\1\DATA\SUSANNE HANSEN TROØYEN\20220411\_B-ST065\_R-CHLOROHYDRIN.D  
Sample Name: B-ST065-F2-chlorohydr

```
=====
Acq. Operator   : Susanne
Acq. Instrument : Instrument 1                      Location : Vial 2
Injection Date  : 11.04.2022 03:10:18              Inj Volume : 10 µl
Acq. Method     : C:\CHEM32\1\METHODS\ELISABETH JACOBSEN\KIRAL_SHT_1.M
Last changed    : 11.04.2022 03:10:01 by Susanne
Analysis Method : C:\CHEM32\1\DATA\SUSANNE HANSEN TROØYEN\20220411_B-ST065_R-CHLOROHYDRIN.D\
                  DA.M (KIRAL_SHT_1.M)
Last changed    : 11.04.2022 04:23:38 by Lucas
Method Info     : Kiral separasjon med Chiralcel OD-H kolonne 250x4.6mm, 5µm
                  Solventer: Heksan + ipa
Sample Info     : 90% hexane 10% IPA CALB chlorohydrin after FC
=====
```

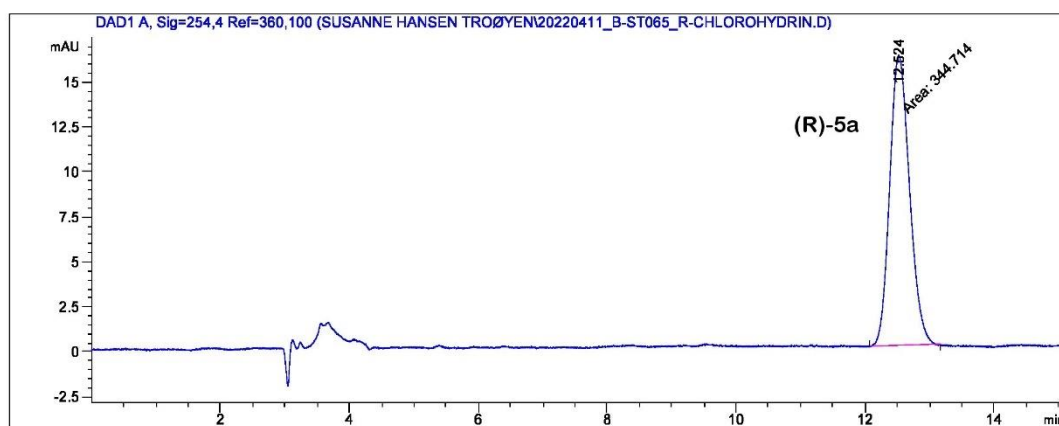

Area Percent Report

```
=====
Sorted By      : Signal
Multiplier     : 1.0000
Dilution       : 1.0000
Use Multiplier & Dilution Factor with ISTDs
=====
```

Signal 1: DAD1 A, Sig=254,4 Ref=360,100

| Peak # | RetTime [min] | Type | Width [min] | Area [mAU*s] | Height [mAU] | Area %   |
|--------|---------------|------|-------------|--------------|--------------|----------|
| 1      | 12.524        | MM   | 0.3556      | 344.71445    | 16.15702     | 100.0000 |

Totals : 344.71445 16.15702

\*\*\* End of Report \*\*\*

**Figure S39.** Chiral HPLC chromatogram of (*R*)-**5a**. The analysis was performed on a Chiralcel OD-H column with *n*-hexane and *i*-PrOH (90:10) as eluent and 1 mL/min flow, and with a detection wavelength of 254 nm. The retention time is  $t_R((R)\text{-5a}) = 12.5$  min.

*1-Bromo-3-(4-(2-(cyclopropylmethoxy)ethyl)phenoxy)propan-2-ol (5b)*

Data File C:\CHEM32\1\DATA\SUSANNE HANSEN TROØYEN\20220311\_B-ST061-F1-BROMOHYDRIN.D  
Sample Name: B-ST061-F1-bromohydrin

```
=====
Acq. Operator   : Susanne
Acq. Instrument : Instrument 1                      Location : Vial 2
Injection Date  : 11.03.2022 11:06:03              Inj Volume : 10 µl
Acq. Method     : C:\CHEM32\1\METHODS\ELISABETH JACOBSEN\KIRAL_SHT_1.M
Last changed    : 11.03.2022 11:05:48 by Susanne
Analysis Method : C:\CHEM32\1\DATA\SUSANNE HANSEN TROØYEN\20220311_B-ST061-F1-BROMOHYDRIN.D\
                  DA.M (KIRAL_SHT_1.M)
Last changed    : 05.04.2022 05:32:26 by Lucas
                  (modified after loading)
Method Info     : Kiral separasjon med Chiralcel OD-H kolonne 250x4.6mm, 5µm
                  Solventer: Heksan + ipa
Sample Info     : 90% n-hexane 10% IPA sep bromohydrin (betaxolol)
=====
```

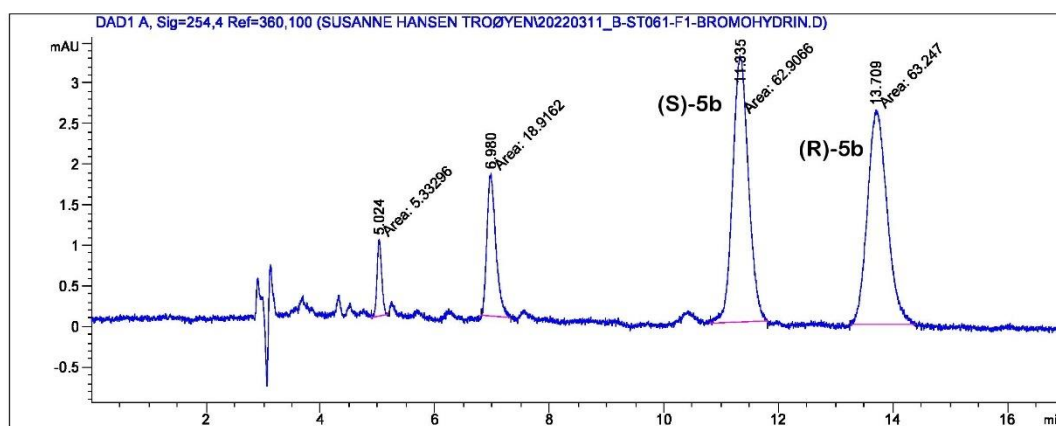

Area Percent Report

```
=====
Sorted By      : Signal
Multiplier     : 1.0000
Dilution       : 1.0000
Use Multiplier & Dilution Factor with ISTDs
=====
```

Signal 1: DAD1 A, Sig=254,4 Ref=360,100

| Peak # | RetTime [min] | Type | Width [min] | Area [mAU*s] | Height [mAU] | Area %  |
|--------|---------------|------|-------------|--------------|--------------|---------|
| 1      | 5.024         | MM   | 0.0940      | 5.33296      | 9.45676e-1   | 3.5458  |
| 2      | 6.980         | MM   | 0.1792      | 18.91615     | 1.75959      | 12.5770 |
| 3      | 11.335        | MM   | 0.3189      | 62.90660     | 3.28753      | 41.8254 |
| 4      | 13.709        | MM   | 0.3981      | 63.24703     | 2.64774      | 42.0518 |

Totals : 150.40274 8.64054

\*\*\* End of Report \*\*\*

**Figure S40.** Chiral HPLC chromatogram of **5b**. The analysis was performed on a Chiralcel OD-H column with *n*-hexane and *i*-PrOH (90:10) as eluent and 1 mL/min flow, and with a detection wavelength of 254 nm. The retention times are  $t_R((S)\text{-}\mathbf{5b}) = 11.3$  min,  $t_R((R)\text{-}\mathbf{5b}) = 13.7$  min.

*(R)*-1-Bromo-3-(4-(2-(cyclopropylmethoxy)ethyl)phenoxy)propan-2-ol, (*R*)-**5b**

Data File C:\CHEM32\1\DATA\SUSANNE HANSEN TROØYEN\2022032\_B-ST064\_F2-BROMO.D  
Sample Name: B-ST064-bromohydrin

=====

|                 |                                                                           |                    |
|-----------------|---------------------------------------------------------------------------|--------------------|
| Acq. Operator   | : Susanne                                                                 |                    |
| Acq. Instrument | : Instrument 1                                                            | Location : Vial 2  |
| Injection Date  | : 06.04.2022 02:15:03                                                     |                    |
|                 |                                                                           | Inj Volume : 10 µl |
| Acq. Method     | : C:\CHEM32\1\METHODS\ELISABETH JACOBSEN\KIRAL_SHT_1.M                    |                    |
| Last changed    | : 06.04.2022 02:13:47 by Susanne                                          |                    |
| Analysis Method | : C:\CHEM32\1\DATA\SUSANNE HANSEN TROØYEN\2022032_B-ST064_F2-BROMO.D\DA.M |                    |
| Last changed    | : 06.04.2022 02:35:35 by Lucas                                            |                    |
| Method Info     | : Kiral separasjon med Chiralcel OD-H kolonne 250x4.6mm, 5µm              |                    |
|                 | Solventer: Heksan + ipa                                                   |                    |
| Sample Info     | : 90% n-hexane 10% IPA bromohydrin after purification from calb           |                    |

=====

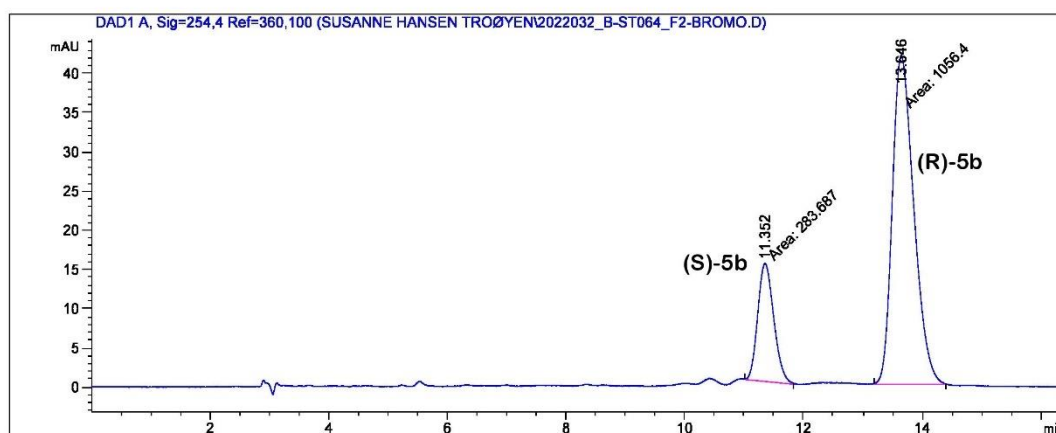

Area Percent Report

Sorted By : Signal  
Multiplier : 1.0000  
Dilution : 1.0000  
Use Multiplier & Dilution Factor with ISTDs

Signal 1: DAD1 A, Sig=254,4 Ref=360,100

| Peak # | RetTime [min] | Type | Width [min] | Area [mAU*s] | Height [mAU] | Area %  |
|--------|---------------|------|-------------|--------------|--------------|---------|
| 1      | 11.352        | MM   | 0.3137      | 283.68704    | 15.07188     | 21.1694 |
| 2      | 13.646        | MM   | 0.4198      | 1056.39661   | 41.94152     | 78.8306 |

Totals : 1340.08365 57.01341

\*\*\* End of Report \*\*\*

**Figure S41.** Chiral HPLC chromatogram of enantiomerically enriched (*R*)-**5b**. The analysis was performed on a Chiralcel OD-H column with *n*-hexane and *i*-PrOH (90:10) as eluent and 1 mL/min flow, and with a detection wavelength of 254 nm. The retention times are  $t_R((S)\text{-}\mathbf{5b}) = 11.3$  min,  $t_R((R)\text{-}\mathbf{5b}) = 13.6$  min.

*1-chloro-3-(4-(2-(cyclopropylmethoxy)ethyl)phenoxy)propan-2-yl butanoate (6a)*

Data File C:\CHEM32\1\DATA\SUSANNE HANSEN TROØYEN\20220218\_B-ST048\_RAC\_ESTER\_99.D  
Sample Name: B-ST048\_rac\_ester

```
=====
Acq. Operator   : Susanne
Acq. Instrument : Instrument 1                      Location : Vial 1
Injection Date  : 18.02.2022 10:28:50              Inj Volume : 10 µl
Acq. Method     : C:\CHEM32\1\METHODS\ELISABETH JACOBSEN\KIRAL_SHT_CALB_GRAD_2.M
Last changed    : 18.02.2022 10:07:37 by Susanne
Analysis Method : C:\CHEM32\1\DATA\SUSANNE HANSEN TROØYEN\20220218_B-ST048_RAC_ESTER_99.D\DA.
M (KIRAL_SHT_CALB_GRAD_2.M)
Last changed    : 05.04.2022 05:33:10 by Lucas
Method Info     : Kiral separasjon med Chiralcel OD-H kolonne 250x4.6mm, 5µm
                  Solventer: Heksan + ipa
Sample Info     : 99% hexane 1% IPA betaxolol racemic ester separation.
=====
```

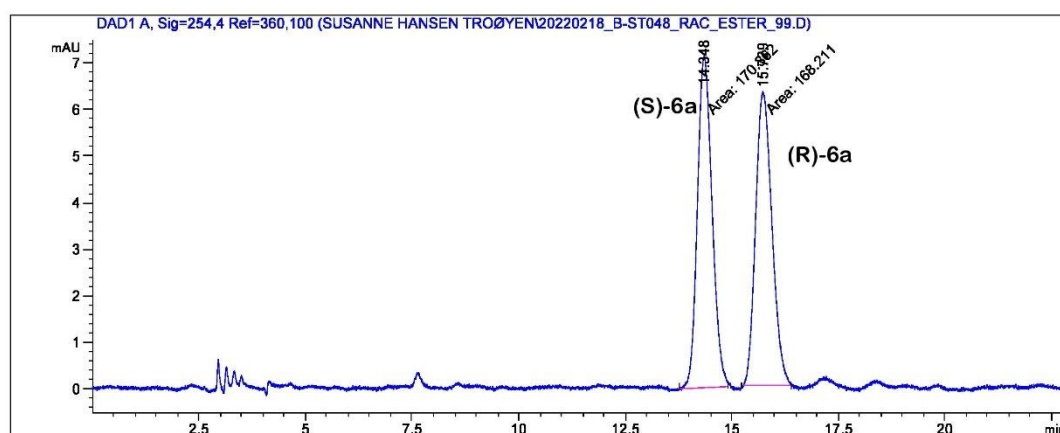

Area Percent Report

```
=====
Sorted By      : Signal
Multiplier     : 1.0000
Dilution       : 1.0000
Use Multiplier & Dilution Factor with ISTDs
=====
```

Signal 1: DAD1 A, Sig=254,4 Ref=360,100

| Peak # | RetTime [min] | Type | Width [min] | Area [mAU*s] | Height [mAU] | Area %  |
|--------|---------------|------|-------------|--------------|--------------|---------|
| 1      | 14.348        | MM   | 0.3991      | 170.36200    | 7.11436      | 50.3177 |
| 2      | 15.729        | MM   | 0.4442      | 168.21086    | 6.31114      | 49.6823 |

Totals : 338.57286 13.42550

\*\*\* End of Report \*\*\*

**Figure S42.** Chiral HPLC chromatogram of **6a**. The analysis was performed on a Chiralcel OD-H column with *n*-hexane and *i*-PrOH (99:1) as eluent and 1 mL/min flow, and with a detection wavelength of 254 nm. The retention times are  $t_R((S)\text{-6a}) = 14.4$  min,  $t_R((R)\text{-6a}) = 15.7$  min.

*(S)*-1-Chloro-3-(4-(2-(cyclopropylmethoxy)ethyl)phenoxy)propan-2-yl butanoate, (*S*)-**6a**

Data File C:\CHEM32\1\DATA\SUSANNE HANSEN TROØYEN\20220224\_B-ST056-F1\_99.D  
Sample Name: B-ST056-ester

```
=====
Acq. Operator   : Susanne
Acq. Instrument : Instrument 1                      Location : Vial 1
Injection Date  : 24.02.2022 09:20:30              Inj Volume : 10 µl
Acq. Method     : C:\CHEM32\1\METHODS\ELISABETH JACOBSEN\KIRAL_SHT_CALB_GRAD.M
Last changed    : 24.02.2022 08:50:42 by Susanne
Analysis Method : C:\CHEM32\1\DATA\SUSANNE HANSEN TROØYEN\20220224_B-ST056-F1_99.D\DA.M (
KIRAL_SHT_CALB_GRAD.M)
Last changed    : 13.04.2022 10:35:51 by Lucas
                (modified after loading)
Method Info     : Kiral separasjon med Chiralcel OD-H kolonne 250x4.6mm, 5µm
                Solventer: Heksan + ipa
Sample Info     : 99% n-hexane 1% IPA sep of ester from CALB kinetic res
                (gradient)
=====
```

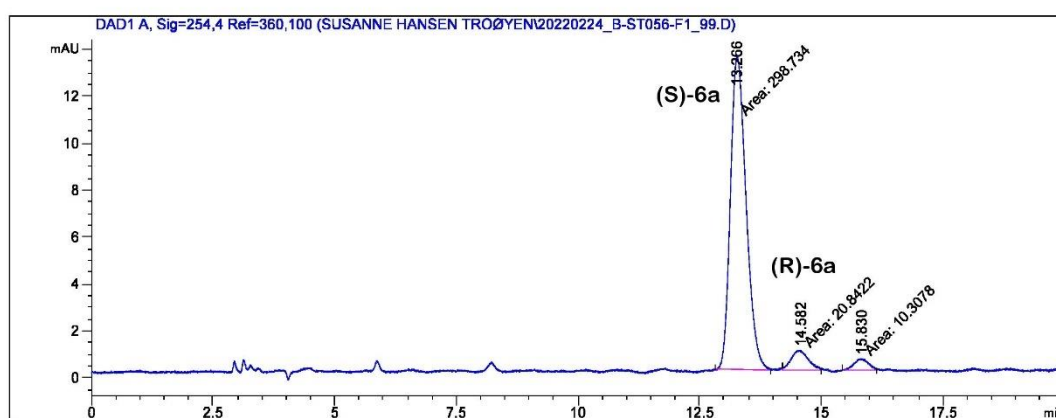

Area Percent Report

```
=====
Sorted By      : Signal
Multiplier     : 1.0000
Dilution       : 1.0000
Use Multiplier & Dilution Factor with ISTDs
=====
```

Signal 1: DAD1 A, Sig=254,4 Ref=360,100

| Peak # | RetTime [min] | Type | Width [min] | Area [mAU*s] | Height [mAU] | Area %  |
|--------|---------------|------|-------------|--------------|--------------|---------|
| 1      | 13.266        | MM   | 0.3738      | 298.73386    | 13.31897     | 90.5573 |
| 2      | 14.582        | MM   | 0.4106      | 20.84216     | 8.45972e-1   | 6.3180  |
| 3      | 15.830        | MM   | 0.3478      | 10.30780     | 4.93923e-1   | 3.1247  |

Totals : 329.88381 14.65887

\*\*\* End of Report \*\*\*

**Figure S43.** Chiral HPLC chromatogram of enantiomerically enriched (*S*)-**6a**. The analysis was performed on a Chiralcel OD-H column with *n*-hexane and *i*-PrOH (99:1) as eluent and 1 mL/min flow, and with a detection wavelength of 254 nm. The retention times are  $t_R((S)\text{-6a}) = 13.3$  min,  $t_R((R)\text{-6a}) = 14.6$  min.

## Betaxolol (7)

Data File C:\CHEM32\1\DATA\SUSANNE HANSEN TROØYEN\20220416\_A-ST068\_RACEMIC\_90.D  
Sample Name: B-68-rac

```
=====
Acq. Operator   : Susanne
Acq. Instrument : Instrument 1                      Location : Vial 3
Injection Date  : 16.04.2022 05:26:23              Inj Volume : 10 µl
Acq. Method     : C:\CHEM32\1\METHODS\ELISABETH JACOBSEN\KIRAL_3_DEA.M
Last changed    : 16.04.2022 05:25:46 by Susanne
Analysis Method : C:\CHEM32\1\DATA\SUSANNE HANSEN TROØYEN\20220416_A-ST068_RACEMIC_90.D\DA.M
                  (KIRAL_3_DEA.M)
Last changed    : 16.04.2022 05:42:44 by Lucas
Method Info     : Kiral separasjon med Chiralcel OD-H kolonne 250x4.6mm, 5µm
                  Solventer: Heksan + ipa
Sample Info     : 90% hexane 10% IPA w 2% DEA betaxolol sep, in IPA
=====
```

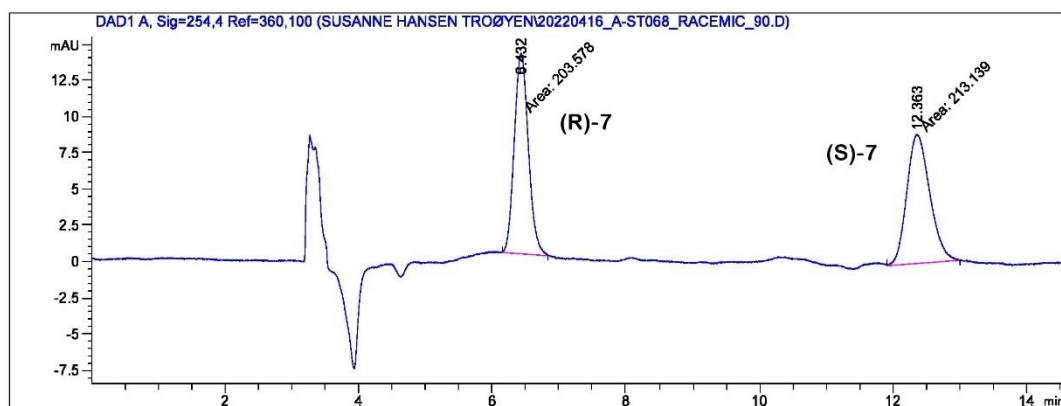

### Area Percent Report

```
=====
Sorted By      : Signal
Multiplier     : 1.0000
Dilution       : 1.0000
Use Multiplier & Dilution Factor with ISTDs
=====
```

Signal 1: DAD1 A, Sig=254,4 Ref=360,100

| Peak # | RetTime [min] | Type | Width [min] | Area [mAU*s] | Height [mAU] | Area %  |
|--------|---------------|------|-------------|--------------|--------------|---------|
| 1      | 6.432         | MM   | 0.2452      | 203.57849    | 13.83809     | 48.8529 |
| 2      | 12.363        | MM   | 0.3992      | 213.13907    | 8.89915      | 51.1471 |

Totals : 416.71756 22.73724

\*\*\* End of Report \*\*\*

**Figure S44.** Chiral HPLC chromatogram of **7**. The analysis was performed on a Chiralcel OD-H column with *n*-hexane:*i*-PrOH:diethylamine (90:9.8:0.2) as eluent and 1 mL/min flow, and with a detection wavelength of 254 nm. The retention times are  $t_R((R)\text{-}7) = 6.4$  min,  $t_R((S)\text{-}7) = 12.4$  min.

(S)-Betaxolol, (S)-7

Data File C:\CHEM32\1\DATA\SUSANNE HANSEN TROØYEN\20220416\_A-ST068\_PURE\_90.D  
Sample Name: B-68

```
=====
Acq. Operator   : Susanne
Acq. Instrument : Instrument 1                      Location : Vial 2
Injection Date  : 16.04.2022 04:49:28              Inj Volume : 10 µl
Acq. Method     : C:\CHEM32\1\METHODS\ELISABETH JACOBSEN\KIRAL_3_DEA.M
Last changed    : 16.04.2022 04:48:38 by Susanne
Analysis Method : C:\CHEM32\1\DATA\SUSANNE HANSEN TROØYEN\20220416_A-ST068_PURE_90.D\DA.M (
KIRAL_3_DEA.M)
Last changed    : 16.04.2022 05:57:49 by Lucas
Method Info     : Kiral separasjon med Chiralcel OD-H kolonne 250x4.6mm, 5µm
                  Solventer: Heksan + ipa
Sample Info     : 90% hexane 10% IPA w 2% DEA betaxolol sep, in IPA
=====
```

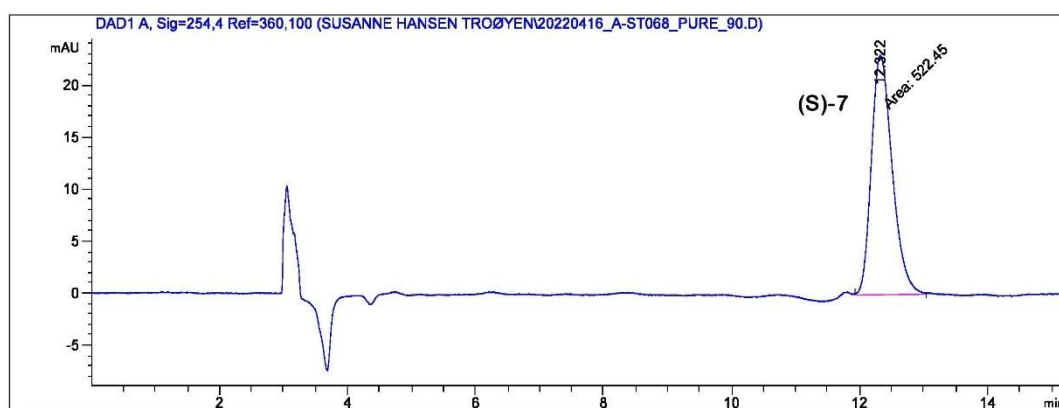

Area Percent Report

```
=====
Sorted By      : Signal
Multiplier     : 1.0000
Dilution       : 1.0000
Use Multiplier & Dilution Factor with ISTDs
=====
```

Signal 1: DAD1 A, Sig=254,4 Ref=360,100

| Peak # | RetTime [min] | Type | Width [min] | Area [mAU*s] | Height [mAU] | Area %   |
|--------|---------------|------|-------------|--------------|--------------|----------|
| 1      | 12.322        | MM   | 0.3781      | 522.44952    | 23.03251     | 100.0000 |

Totals : 522.44952 23.03251

\*\*\* End of Report \*\*\*

**Figure S45.** Chiral HPLC chromatogram of (S)-7. The analysis was performed on a Chiralcel OD-H column with *n*-hexane:*i*-PrOH:diethylamine (90:9.8:0.2) as eluent and 1 mL/min flow, and with a detection wavelength of 254 nm. The retention time is  $t_R((S)\text{-}7) = 12.3$  min.
